# Supplementary material for: Male Circumcision for HIV Prevention in High HIV Prevalence Settings: What Can Mathematical Modelling Contribute to Informed Decision Making?
Source: PLOS journal article supplement (doi:10.1371/journal.pmed.1000109), 2009-09-08
Supplement: S8 (10.1371/journal.pmed.1000109.s008) [file journal.pmed.1000109.s008]

# Cost of the roll-out of male circumcision in sub-Saharan Africa

Bertran Auvert  
Jim Kahn  
Eline Korenromp  
Jamie Llyod-Smith  
Stephane HELLERINGER  
Remi Sitta  
Dirk Taljaard  
John Hargrove  
Brian Williams  
Elliot Marseille

INSERM  
UCSF  
The Global Fund  
Pennsylvania State University  
University of Pennsylvania  
INSERM  
Progressus  
SACEMA  
WHO  
UCSF

France  
USA  
Switzerland  
USA  
France  
South Africa  
Switzerland  
USA

UNAIDS/WHO/SACEMA Consultation  
Making Decisions on Male Circumcision for HIV Risk Reduction: Modelling the Impact and Costs  
Stellenbosch, South Africa – 15-16 November 2007

## Objectives

Key health economics estimates of the roll-out of MAMC\* in sub-Saharan Africa:

- Number of circumcisers needed**
- Cost of the roll-out** (Discounted to present 3% annually)
- Net cost** (after adjustment for averted HIV medical costs)
- Cost per HIV infection averted (cost-effectiveness)**
- Number of circumcisions to avoid one HIV infection**

\*MAMC=medicalized adult male circumcision

## Methods

Geographical setting (country, province...)

HIV and demographics models

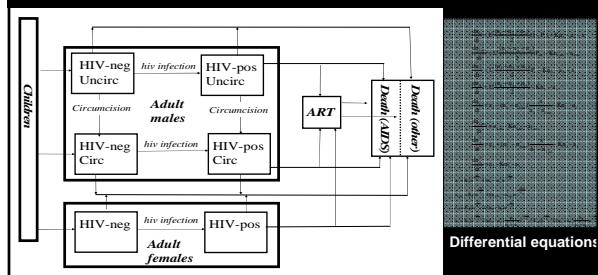

## Input parameters

31 input parameters: One set per country  
Sources: WHO, The Global Fund, OF,  
publications, opinion of experts

## Output parameters

- Number of circumcisers needed
- Cost of the roll-out (Discounted to present 3% annually)
- Net cost (after adjustment for averted HIV medical costs)
- Cost per HIV infection averted (cost-effectiveness)
- Number of circumcisions to avoid one HIV infection

## Sensitivity analysis

Delta(input) → Delta (output)  
Not presented

## Range for each output

Monte Carlo simulation (aggregate uncertainty from all inputs)  
Each input → range  
random samples of input parameters → random samples of outputs  
Range = 2.5 – 97.5 percentile

| Input parameters                                                   | Value                  |
|--------------------------------------------------------------------|------------------------|
| Initial population size of adults in the geographic setting        | 6 260 000              |
| Birthrate                                                          | 4.0 % per year         |
| Life expectancy when becoming adult (without HIV)                  | 35 years               |
| Adult males circumcised (in traditional setting)                   | 10 %                   |
| Percent of males who will not accept circumcision                  | 15 %                   |
| Duration to reach maximum male circumcision prevalence             | 5 years                |
| Initial number of circumcisers                                     | 10                     |
| Number of circumcisions per day per circumciser                    | 10                     |
| Number of working days per year                                    | 230                    |
| MC effect (reduction of female to male transmission)               | 60 %                   |
| MC effect (reduction of male to female transmission)               | 10 %                   |
| Initial HIV prevalence among adults                                | 24.4 %                 |
| MC effect (reduction of female to male transmission)               | 10 %                   |
| MC effect (reduction of male to female transmission)               | 10 %                   |
| Percent of HIV(+) receiving treatment before ARV eligible          | 30 %                   |
| Cost of this treatment (total)                                     | 799 US\$               |
| Life expectancy on ARVs                                            | 13 years               |
| Percent of HIV(+) eligible for ARVs who receive ARVs               | 30 %                   |
| Cost of ART (annual)                                               | 639 US\$               |
| Percent of HIV(+) eligible for ARVs who receive non-ARV treatment  | 30 %                   |
| Cost of this treatment (total)                                     | 1 764 US\$             |
| Discount rate (annual)                                             | 3.0 % per year         |
| Cost model (Public/Private)                                        | 1                      |
| Private: Geographic setting level (communication, management, M&E) | 10 %                   |
| Private: Circumcision cost (inclusive)                             | 22.0 US\$              |
| Public: Geographic setting level (communication, management, M&E)  | 20 %                   |
| Public: Initial investment per circumcision unit                   | 7 482 US\$ for year #1 |
| Public: Number of circumcisers per circumcision unit               | 2                      |
| Public: Initial training per circumciser                           | 674 US\$               |
| Public: Salary of each circumciser                                 | 169 US\$ per month     |
| Public: Circumcision cost (variable)                               | 10.4 US\$              |

## Input parameters: Demographics, HIV transmission, discounting

|                                                               |                |
|---------------------------------------------------------------|----------------|
| Initial population size of adults in the geographic setting   | 6 260 000      |
| Birthrate                                                     | 4.0 % per year |
| Life expectancy when becoming adult (without HIV)             | 35 years       |
| Number of working days per year                               | 230            |
| MC effect (reduction of female to male transmission)          | 60 %           |
| MC effect (reduction of male to female transmission)          | 10 %           |
| Initial HIV prevalence among adults                           | 24.4 %         |
| Uncirc.male-to-female/f-to-uncirc.m ratio of transmissibility | 1.5            |
| Discount rate (annual)                                        | 3.0 % per year |

## Input parameters: Intervention

|                                                        |         |
|--------------------------------------------------------|---------|
| Adult males circumcised (in traditional setting)       | 10 %    |
| Percent of males who will not accept circumcision      | 15 %    |
| Duration to reach maximum male circumcision prevalence | 5 years |
| Initial number of circumcisers                         | 235     |
| Number of circumcisions per day per circumciser        | 10      |
| Number of working days per year                        | 230     |

## Input parameters: Cost of the intervention

|                                                                    |                        |
|--------------------------------------------------------------------|------------------------|
| Private: Geographic setting level (communication, management, M&E) | 10 %                   |
| Private: Circumcision cost (inclusive)                             | 22.0 US\$              |
| Public: Geographic setting level (communication, management, M&E)  | 20 %                   |
| Public: Initial investment per circumcision unit                   | 7 482 US\$ for year #1 |
| Public: Number of circumcisers per circumcision unit               | 2                      |
| Public: Initial training per circumciser                           | 674 US\$               |
| Public: Salary of each circumciser                                 | 169 US\$ per month     |
| Public: Circumcision cost (variable)                               | 10.4 US\$              |

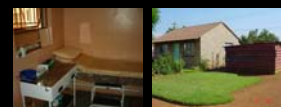

## Input parameters: Cost HIV treatment

|                                                                   |            |
|-------------------------------------------------------------------|------------|
| Percent of HIV(+) receiving treatment before ARV-eligible         | 30 %       |
| Cost of this treatment (total)                                    | 799 US\$   |
| Percent of HIV(+)s eligible for ARVs who receive ARVs             | 30 %       |
| Life expectancy on ARVs                                           | 13 years   |
| Cost of ART (annual)                                              | 639 US\$   |
| Percent of HIV(+) eligible for ARVs who receive non-ARV treatment | 30 %       |
| Cost of this treatment (total)                                    | 1 764 US\$ |

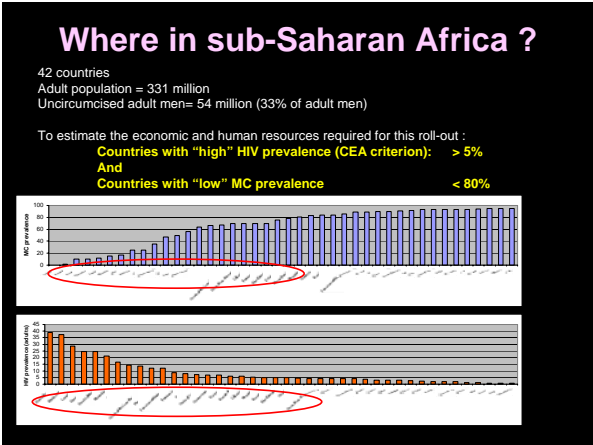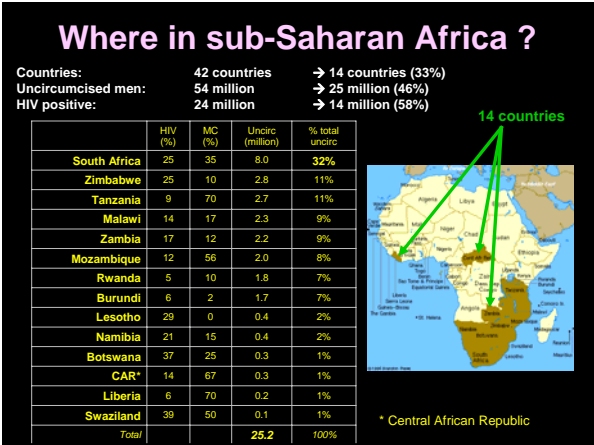

## Conclusion

**Preliminary results:** Input data to be refined  
(esp. private sector costs, currently exploratory only)

**Expensive but reasonable** in view of favorable  
cost-effectiveness and saving

**Implementation model** (private, public, both...) ?  
(local context, availability...)

User friendly tool to be designed for use by  
decision makers, researchers and funders

**Is cost the main issue ?**

## Costing: Where are we now?

Lori Bollinger

Prepared for:  
UNAIDS/WHO/SACEMA Consultation  
Making Decisions on Male Circumcision for HIV Risk  
Reduction: Modelling the Impact and Costs

Stellenbosch, South Africa – 15-16 November 2007

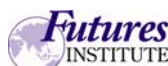

## MC costing studies

- 7 studies citing unit cost
  - All from Southern Africa
  - Quality of costing data varies
    - Not all studies have complete descriptions of intervention elements
      - Sometimes study focus is impact rather than cost
      - Exception: LSZ2 studies
  - Target population is adult males

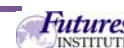

## Summary of MC Studies

| Country        | Year of data collection | Service delivery mode                 |
|----------------|-------------------------|---------------------------------------|
| Kenya *        | 2005                    | Government & private                  |
| Lesotho        | 2007                    | Public/NGO hospitals                  |
| South Africa * | 2003                    | Charge at GP offices                  |
| Swaziland      | 2007                    | Public/private hospitals, NGO clinic  |
| Uganda         | 2006/7                  | n/a                                   |
| Zambia 1 *     | 2003                    | Hospital                              |
| Zambia 2       | 2007                    | Public hospitals, NGO/private clinics |

\* Inflated to 2006 US\$ (South Africa, inflated in study itself)

## MC unit cost (US\$)

| Country      | Unit cost                                        | General protocol                                                  |
|--------------|--------------------------------------------------|-------------------------------------------------------------------|
| Kenya        | \$20.78 – supplies only                          | 5 visits                                                          |
| Lesotho      | \$45.35, \$56.35 *                               | 4 visits                                                          |
| South Africa | \$55.76                                          | Cost charged per surgery in GP office + complications + IEC (\$5) |
| Swaziland    | \$40.30, \$51.30 *                               | Cost per surgery including post-op care                           |
| Uganda       | \$69                                             | Cost per surgery including post-op care                           |
| Zambia 1     | \$8.62 – supplies, not anesthesia or painkillers | n/a                                                               |
| Zambia 2     | \$35.79, \$46.82 *                               | 4 visits                                                          |

\* Comprehensive unit cost

## MC costing studies (comprehensive unit costs)

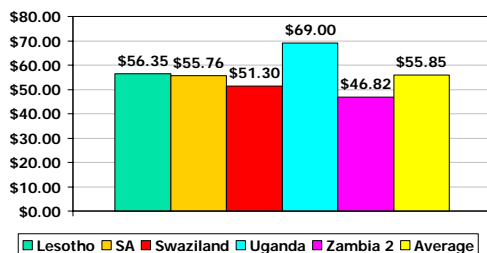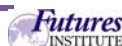

## Supplies portion of MC unit cost

| Country  | Unit cost (supplies only) | Anesthesia               | Antibiotics              | Analgesics                                               | Dressing applied visit #3 |
|----------|---------------------------|--------------------------|--------------------------|----------------------------------------------------------|---------------------------|
| Kenya    | \$20.78                   | Local                    | n/a                      | Paracetamol (5 days) + tramadol hydrochloride (2 nights) | n/a                       |
| Lesotho  | \$10.61                   | Local (private: general) | Routinely prescribed     | Ibuprofen/Paracetamol                                    | 100% re-applied           |
| Swazi    | \$14.23                   | Local                    | Not routinely prescribed | Paracetamol                                              | 50% re-applied            |
| Zambia 1 | \$8.62                    | Excluded                 | n/a                      | Excluded                                                 | n/a                       |
| Zambia 2 | \$9.81                    | Local                    | Not routinely prescribed | Paracetamol                                              | Not re-applied            |

### Marginal increase in unit cost due to treating complications

| Country      | Marginal increase in unit cost | Type/frequency of complications                                                                                                         |
|--------------|--------------------------------|-----------------------------------------------------------------------------------------------------------------------------------------|
| Kenya        | n/a                            | 1.3% infections, 0.8% bleeds, 0.8% delayed healing/disrupted wounds, 0.4% swelling, 0.2% anesthetic reaction, 0.2% erectile dysfunction |
| Lesotho      | \$1.18                         | 11% hemorrhage, 3% sepsis                                                                                                               |
| South Africa | \$1.04                         | 3.7% short-term, 0.13% inpatient, 0.93% long-term                                                                                       |
| Swaziland    | \$0.74                         | 2% hemorrhage, 5% sepsis                                                                                                                |
| Zambia 2     | \$1.16                         | 2.1% hemorrhage, 13% sepsis                                                                                                             |

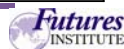

### Recommendation

- Use average unit cost of \$55.85
  - In sensitivity analysis, vary unit cost from \$47 to \$69

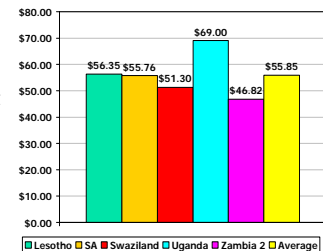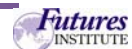

### Observation #1:

- 23% of men reported having had sex since their circumcision at 30 days after surgery (Kenya)
- Conclusion: IEC materials *must* include information for sexual partners of circumcised men

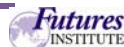

### Observation #2:

- Zambia: Private providers at University Teaching Hospital (UTH) in Lusaka recently were charging K350,000 vs. the K10,000 charge in public sector
  - US\$89.45 vs. US\$2.55
  - HPI Zambia study had private sector price of K200,000
- Conclusion: Pent-up demand exists

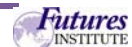

### Costing: Where are we now?

Lori Bollinger

Prepared for:  
UNAIDS/WHO/SACEMA Consultation  
Making Decisions on Male Circumcision for HIV Risk  
Reduction: Modelling the Impact and Costs

Stellenbosch, South Africa – 15-16 November 2007

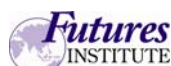

# Understanding the Impact of Circumcision on the Heterosexual Spread of HIV in Zimbabwe

Tim Hallett\*, Jennifer Smith, Simon Gregson & Geoff Garnett  
Imperial College London

\*timothy.hallett@imperial.ac.uk



## Two Phases Of Work

1. With MoH/CDC in Zimbabwe:

- Tool for analysing impact (for distribution)
- Age targeting

2. Other work:

- Quantifying uncertainty in the potential impact of MC interventions
  - In Zimbabwe
  - Generally...?

## Three Models

- In common:
  - Deterministic representation of heterosexual transmission of HIV in 'risk'-stratified population: ODE/PDE
  - HIV in four stages + ART
  - Mixing can vary between "assortative" and "random" wrt risk.
  - Men can go: uncircumcised -> wound healing -> circumcised
  - Transmission depends on condom use / sex of infected partner / circ-status of man / risk-group of partners
  - MC intervention rolled-out over time
- Differences:
  - **Model A:** not age-structured, Excel spreadsheet for distribution
  - **Model B:** age-structured & parameterised for Zimbabwe (compiled code)
  - **Model C:** not age-structured, compiled code optimised for speed, designed for use in uncertainty analysis

## Tool for analysing impact (for distribution)

(Model A)

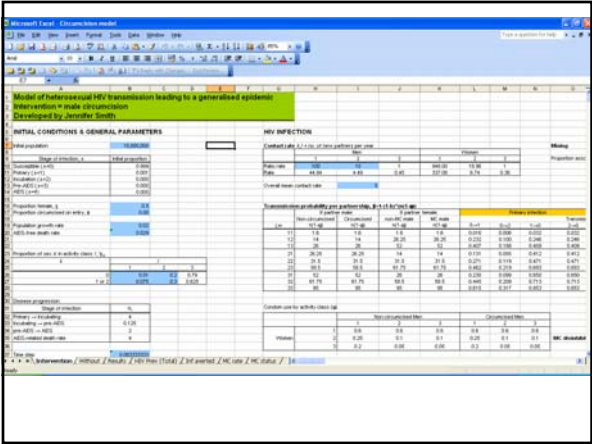

## Excel Model

**INPUTS**

- Sexual behaviour
  - Mean and distribution of partner change rate
  - Pattern of mixing
  - Num sex acts and condom use in high and low-risk partnerships
- HIV transmission
  - Rate per act; varies by stage of infection
- Impact of interventions
  - Magnitude & timing (when start, max rate, speed of scale-up, character of men)
  - Biological effect (aq & tr / wound)
  - Behavioural changes (reduce condom use)

**OUTPUTS**

- Prevalence (t)
- Incidence (t)
- Infections averted (T)
- AIDS deaths averted (T)
- Number of operations (T)

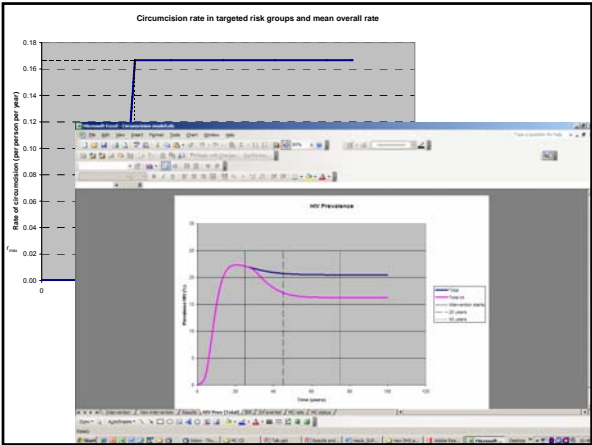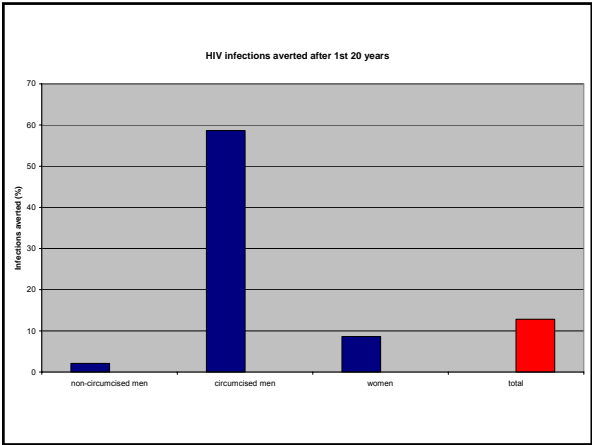

**Result From Model:**

- Basic epidemiological insights
- Basic predictions of impact of interventions
- Preliminary assessment of uncertainty about impact of circumcision interventions

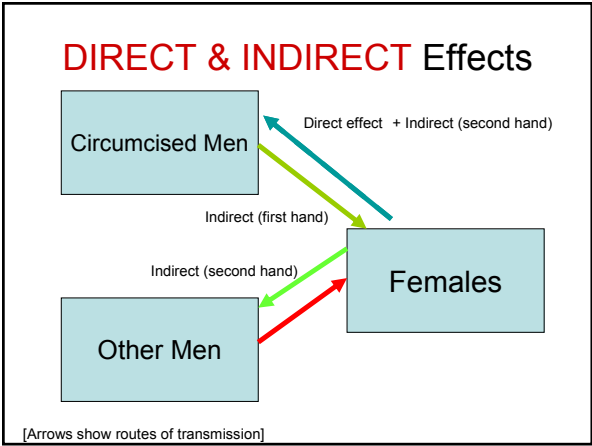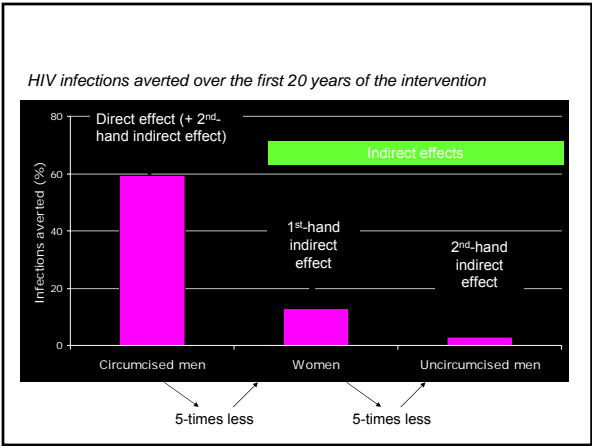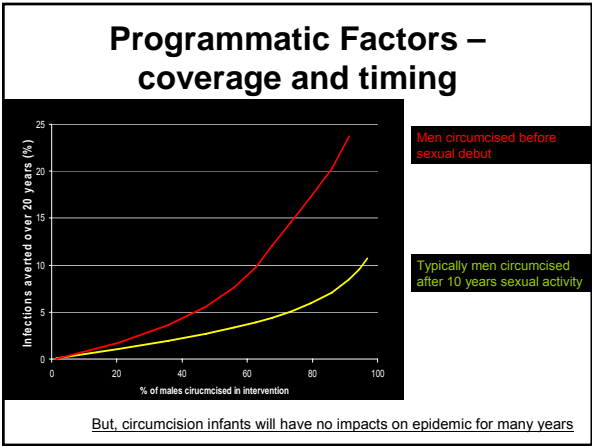

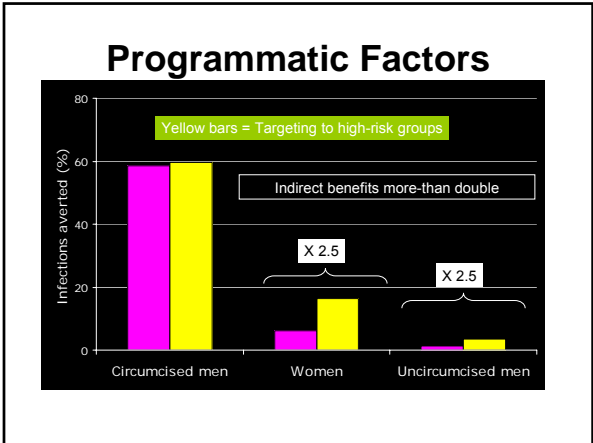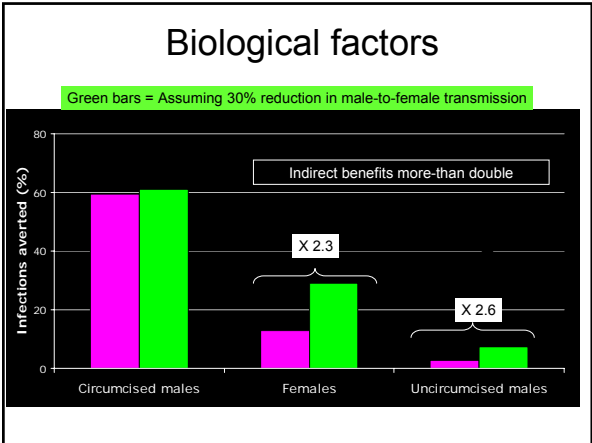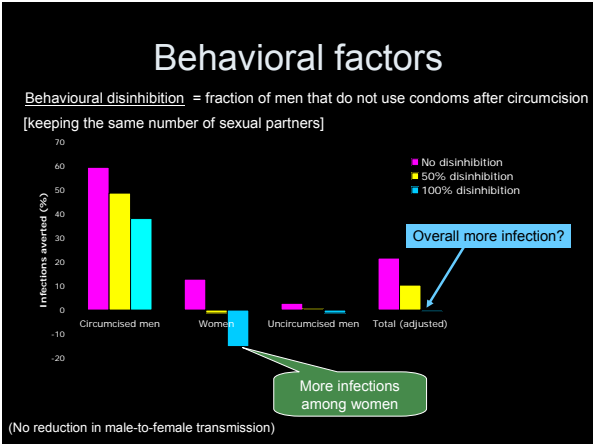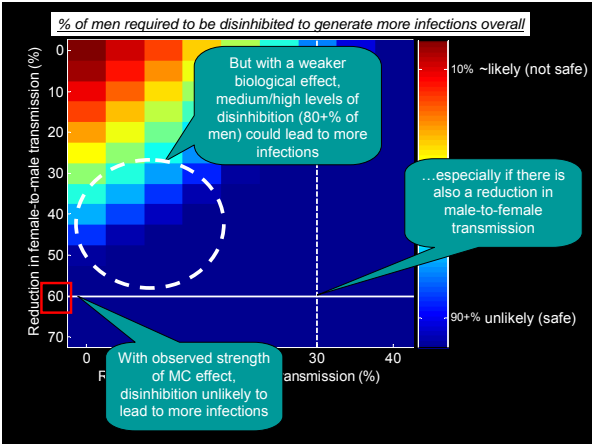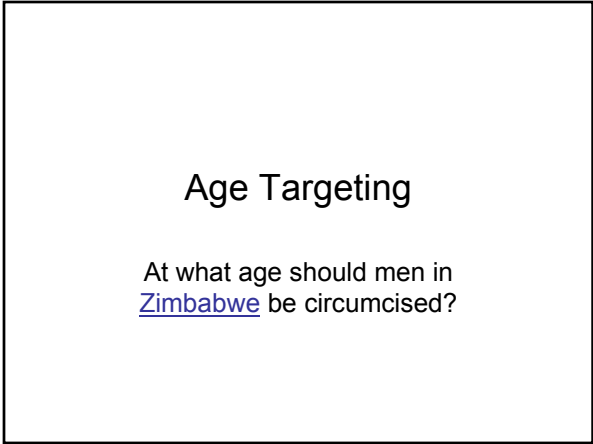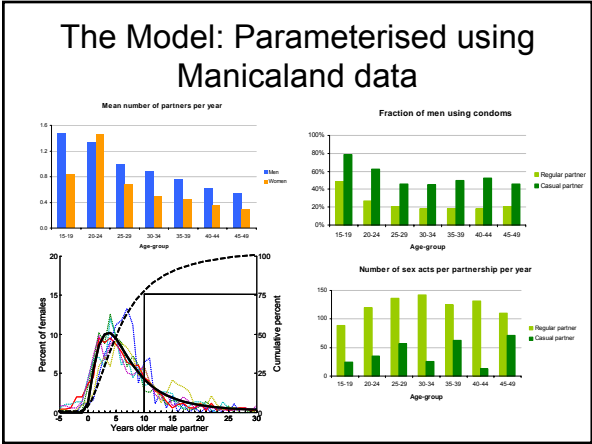

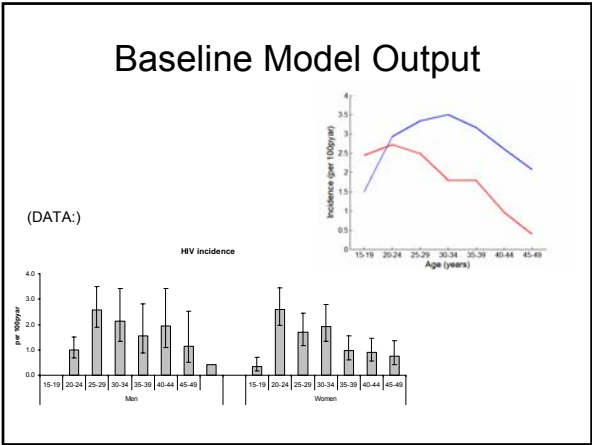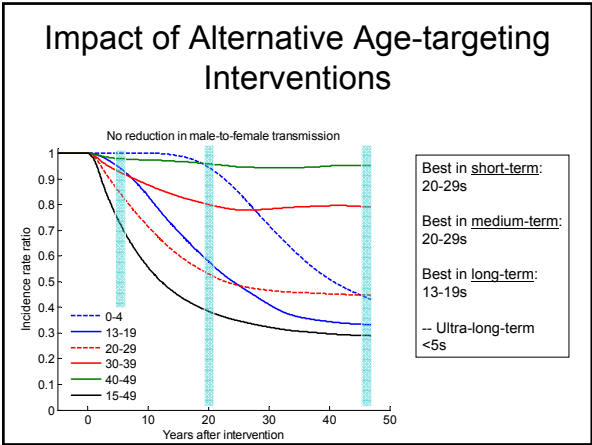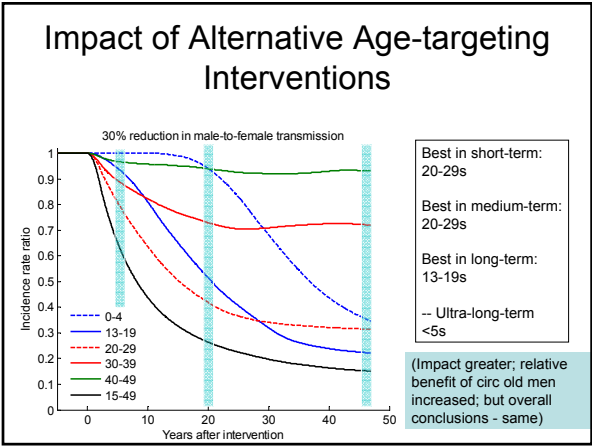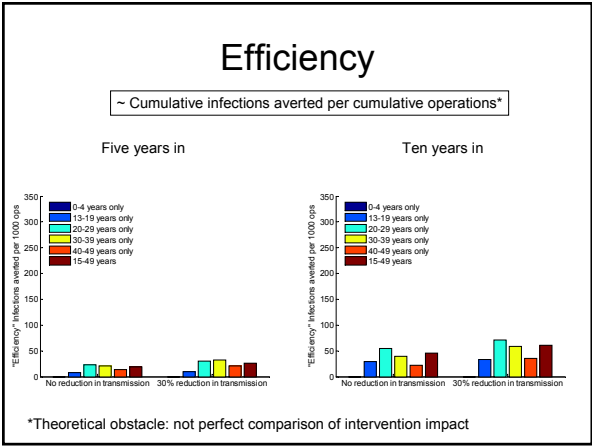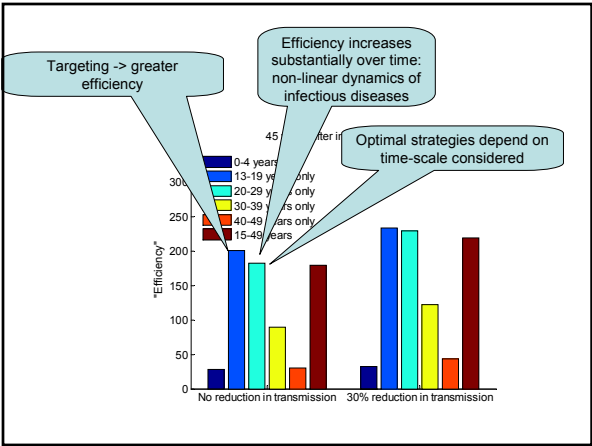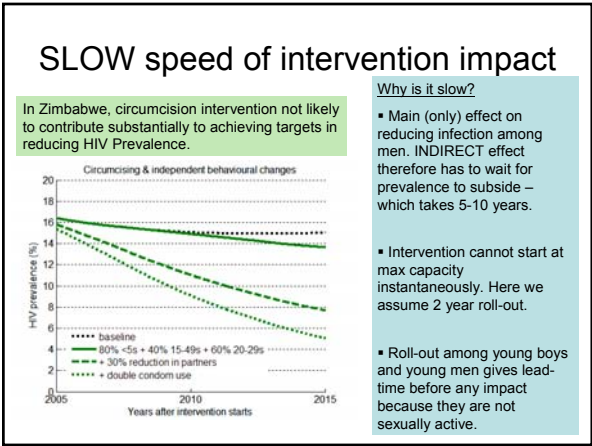



## Quantifying uncertainty in the potential impact of MC interventions

## Approach

- Aim: Calculate expected impact of intervention, quantify uncertainty and identify key determinants of impact
- To do this: Quantify variation in the many parameters that might have a bearing on the expected impact of the intervention (e.g. reduction in incidence).
- STEP 1: Fit model to Zimbabwe prevalence time series
- STEP 2: Apply range of interventions and measure effect.

## Methods (Step 1)

- Background parameters determine profile of epidemic before intervention (e.g. condom use, partner change rate, mixing pattern, etc)
- Estimates of parameter value based on data from Manicaland (rural Eastern area). (Possible range of values determined by 95% confidence interval or credible range)
- Use LHS to generate 200,000 possible parameter combination.
- Reject those that do not generate epidemic consistent with observed prevalence trends.

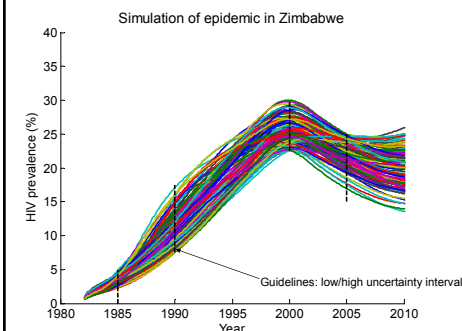

100 parameter-sets were found that were "consistent" with Zim prevalence curve.

## Methods (Step 2)

- Quantify range of possible values for "intervention" parameters
  - Coverage of intervention: 80% of population (fixed for all simulations)
  - RR acquire infection if circumcised:

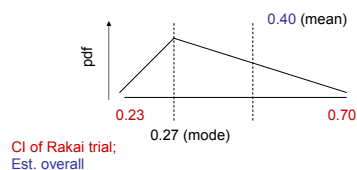

## Methods (Step 2)

- RR transmit infection if circumcised:

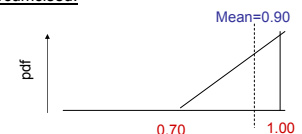

- Period of wound healing = 8 weeks (fixed)
- RR acquire infection during wound healing: 0.8-1.2 (mean=1)
- RR transmit infection during wound healing: 1-3 (mean=2)
- Fraction of men sexually active during wound healing: 5-20% (mean=10%)

## Methods (Step 2)

- Risk compensation (=behavioural disinhibition):
  - Less condom use with non-regular partner
  - Less condom use with regular partner
  - More sexual partners

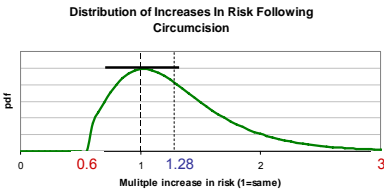

## Methods (Step 2)

- Distribution of output will approximate expected distribution of predicted effect (quantifies uncertainty).

→ Can identify which parameters most determine the output.

→ Can quantify impact of changing selected parameters without specifying precise values for other parameters (analysis shows 'average' effect over all regions of parameter space).

- Generate 12,000 different intervention scenarios
- Pair randomly with baseline scenarios
- (→ each baseline scenario is tested with ~120 different intervention scenarios)

## Model

- Deterministic ODE, solved numerically
- Population stratified by gender/risk/circumcision-status (not, wound-healing, circumcised)
- Pattern of sexual partnership formation determined by: "balance", "replacement" and "mixing" (-- will explain --)
- Sexual behaviour can change after circumcision (num partners, condom use with regular and/or non-regular partners)
- ART roll-out represented.

## Model

Keep scale of intervention the same in all runs (=optimistic).

- Intervention scaled-up starts in 30 years after epidemic starts.
- Instantaneously get to full-scale
- 20% of sexually men get circumcised a year
- + 80% of men starting sex have already been circumcised

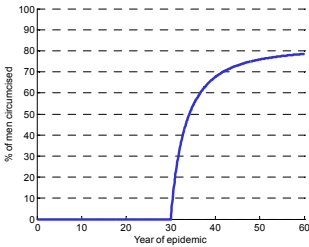

### Overall impact of intervention

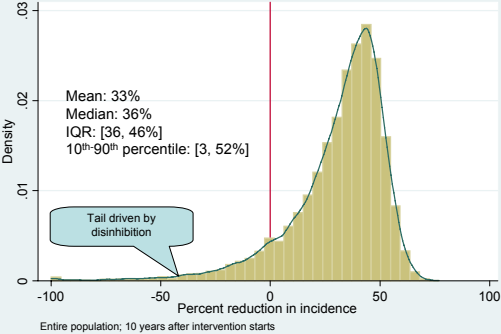

### Overall impact of intervention

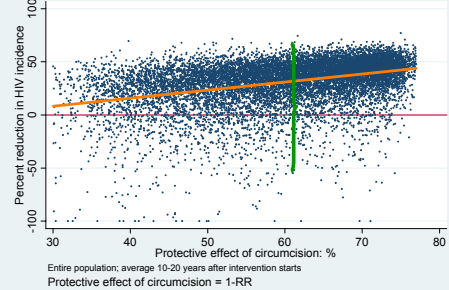

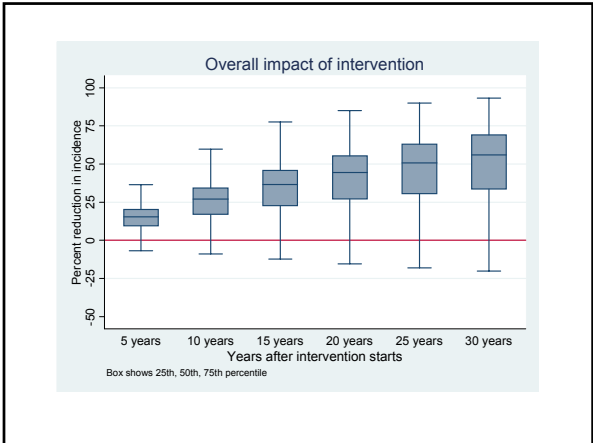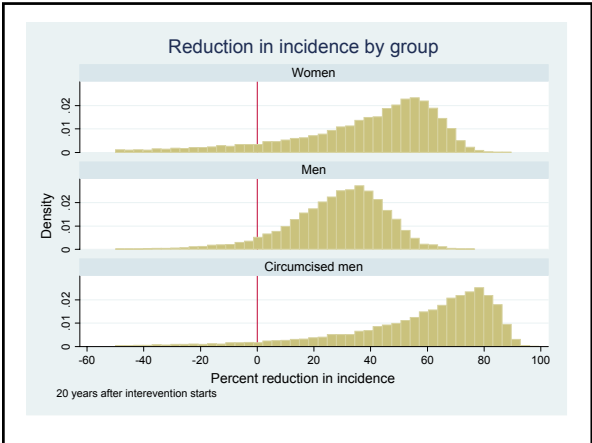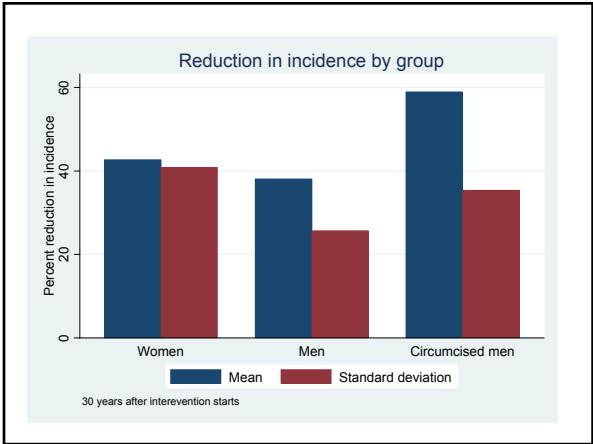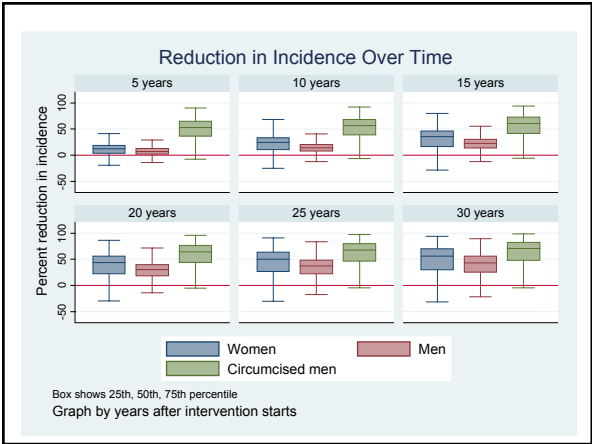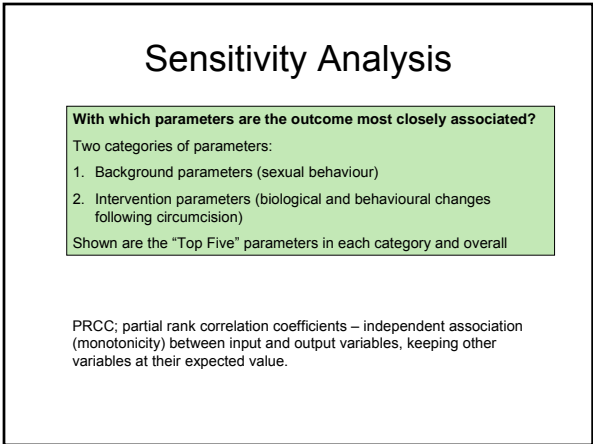

Output= reduction in incidence across whole population, 30 years after intervention starts

|                                             |       |
|---------------------------------------------|-------|
| 'All parameters:'                           | "     |
| 'Increase in rate of partner change'        | -0.74 |
| 'RR acquire infection if circumcised'       | -0.72 |
| 'Increase risk with reg ptr if circumcised' | -0.64 |
| 'Increase risk with non-reg if circumcised' | -0.58 |
| 'RR transmit infection if circumcised'      | -0.38 |
| 'Background parameters'                     | "     |
| 'Male control mixing'                       | -0.22 |
| 'Condom use in regular partnerships'        | -0.16 |
| 'Recent changes in partner change rate'     | -0.12 |
| 'Fraction of males in low risk group'       | 0.11  |
| 'Sex acts in non-regular partnerships'      | -0.10 |
| 'Intervention parameters'                   | "     |
| 'Increase in rate of partner change'        | -0.74 |
| 'RR acquire infection if circumcised'       | -0.72 |
| 'Increase risk with reg ptr if circumcised' | -0.64 |
| 'Increase risk with non-reg if circumcised' | -0.58 |
| 'RR transmit infection if circumcised'      | -0.38 |

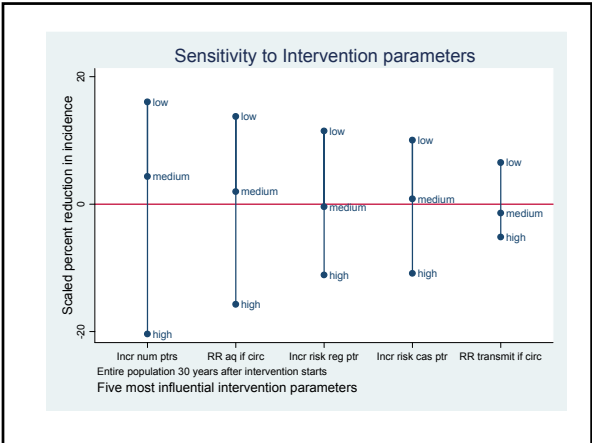

|                 |                                           |       |                                           |       |
|-----------------|-------------------------------------------|-------|-------------------------------------------|-------|
| All             | All parameters:                           |       | Men                                       |       |
|                 | Incr in rate of partner change            | -0.74 | RR acquire infection if circumcised       | -0.68 |
|                 | RR acquire infection if circumcised       | -0.72 | Increase risk with non-reg if circumcised | -0.60 |
|                 | Increase risk with reg ptr if circumcised | -0.64 | Increase risk with reg ptr if circumcised | -0.57 |
|                 | Increase risk with non-reg if circumcised | -0.58 | Incr in rate of partner change            | -0.44 |
|                 | RR transmit infection if circumcised      | -0.38 | RR transmit infection if circumcised      | -0.34 |
|                 | Background parameters:                    |       | Background parameters:                    |       |
|                 | Male control mixing                       | -0.22 | Male control mixing                       | -0.22 |
|                 | Condom use in regular partnerships        | -0.16 | Recent changes in partner change rate     | -0.20 |
|                 | Recent changes in partner change rate     | -0.12 | Condom use in regular partnerships        | -0.12 |
| Women           | Fraction of males in low risk group       | 0.11  | Risk ratio in medium-risk group (males)   | -0.09 |
|                 | Sex acts in non-regular partnerships      | -0.19 | Fraction of males in low risk group       | 0.08  |
|                 | Intervention parameters:                  |       | Intervention parameters:                  |       |
|                 | Incr in rate of partner change            | -0.74 | RR acquire infection if circumcised       | -0.68 |
|                 | RR acquire infection if circumcised       | -0.72 | Increase risk with non-reg if circumcised | -0.60 |
|                 | Increase risk with reg ptr if circumcised | -0.66 | Increase risk with reg ptr if circumcised | -0.57 |
|                 | Increase risk with non-reg if circumcised | -0.58 | Incr in rate of partner change            | -0.44 |
|                 | RR transmit infection if circumcised      | -0.38 | RR transmit infection if circumcised      | -0.34 |
|                 | Background parameters:                    |       | Background parameters:                    |       |
|                 | Male control mixing                       | -0.22 | Male control mixing                       | -0.22 |
| Circumcised Men | Condom use in regular partnerships        | -0.16 | Recent changes in partner change rate     | -0.20 |
|                 | Recent changes in partner change rate     | -0.12 | Condom use in regular partnerships        | -0.12 |
|                 | Fraction of males in low risk group       | 0.11  | Risk ratio in medium-risk group (males)   | -0.09 |
|                 | Sex acts in non-regular partnerships      | -0.19 | Fraction of males in low risk group       | 0.08  |
|                 | Intervention parameters:                  |       | Intervention parameters:                  |       |
|                 | Incr in rate of partner change            | -0.74 | RR acquire infection if circumcised       | -0.68 |
|                 | RR acquire infection if circumcised       | -0.72 | Increase risk with non-reg if circumcised | -0.60 |
|                 | Increase risk with reg ptr if circumcised | -0.66 | Increase risk with reg ptr if circumcised | -0.57 |
|                 | Increase risk with non-reg if circumcised | -0.58 | Incr in rate of partner change            | -0.44 |
|                 | RR transmit infection if circumcised      | -0.38 | RR transmit infection if circumcised      | -0.34 |

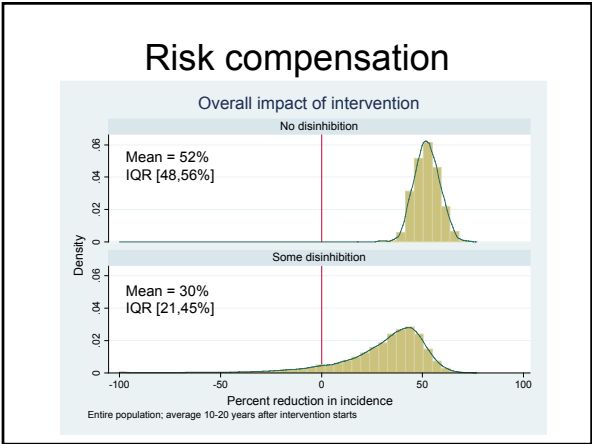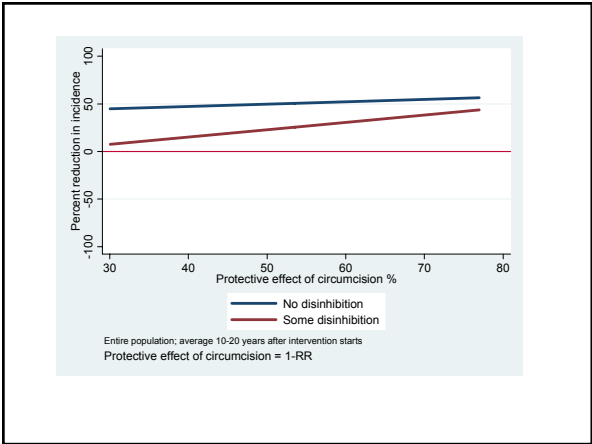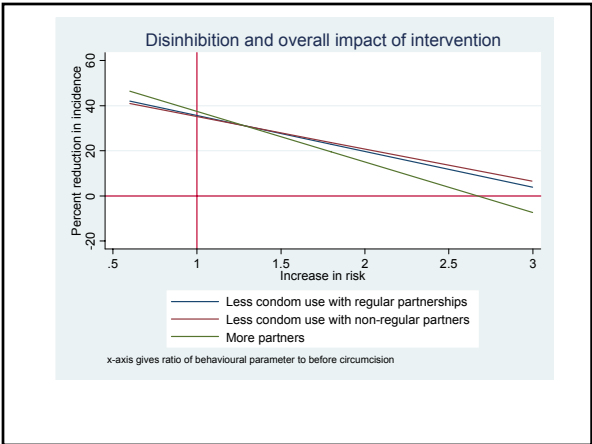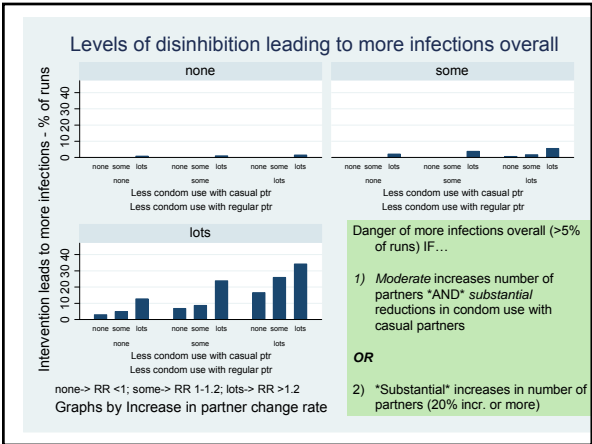

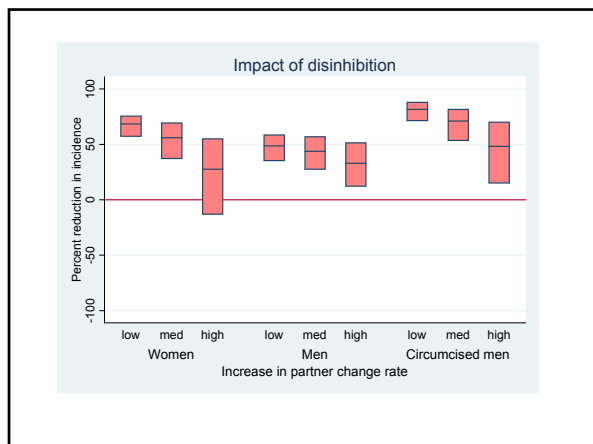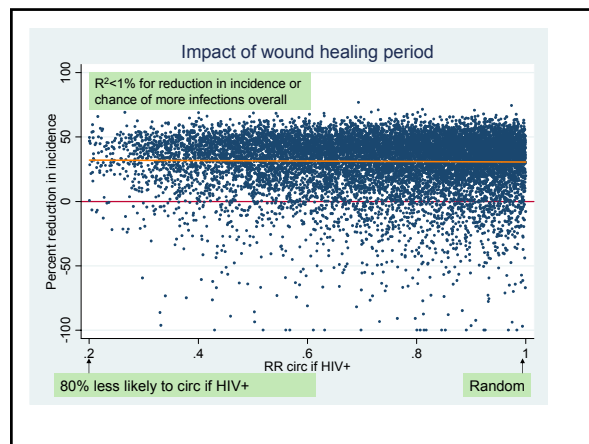

## General Uncertainty Analysis

- Which of these conclusion are specific to Zimbabwe?
- How much does information of sexual behaviour/prevalence in Zimbabwe help refine predictions?
- Can an “overall” measure of the impact of circumcision interventions be quantified?

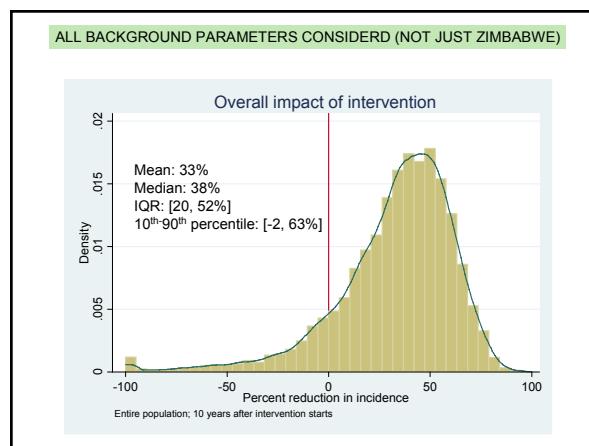

## Conclusions

- Impact of circumcision at population level mediated by DIRECT and INDIRECT effects.
- One component of the **DIRECT EFFECT** (on reduced risk of acquisition) has been quantified by RCTS. The other component (transmission) is not known. The magnitude of **INDIRECT EFFECTS** depend on the sexual behaviour and the pattern of risk in the population – also not known.
- Therefore, there is considerable uncertainty in the impact of the intervention – but we can make an attempt to quantify this using mathematical models.

## Conclusions

- **Across all settings:**  
Over 10-20 years, circumcision likely to reduce HIV incidence by 20-52% (IQR). This includes:
  - Incidence among women reduced by: ~36%
  - Incidence among circumcised men reduced : ~53%
- **In Zimbabwe:**  
Over 10-20 years, circumcision likely to reduce HIV incidence by 36-46% (IQR). This includes:

## Conclusions

- The impact of circumcision will emerge slowly
  - First among circumcised men
  - Then among women
  - Then among other men
 (Faster if direct effect on transmission)
- There is a chance that the intervention will lead to more infection overall if there is substantial behavioural disinhibition following circumcision.

## Conclusions (...cntd)

- For each demographic group and overall, the most important determinant of impact is the extent of risk compensation – especially increases in partner numbers.
- Other important not-quantified determinants are:
  - Changes in condom use – especially with casual partners
  - Rate of transmission from infected circumcised men
- Properties of sexual network have relatively less influence than properties of intervention.  
(Interactions “intervention\*epi-context” not yet explored)

## Conclusions (...cntd)

- Behavioural changes following circumcision could substantially reduce impact of intervention
- Reduces the impact for women, especially.
- Worst types are: more partners & less condom use with casual partners
- Can even lead to more infections overall if, either:
  - *Moderate* increases number of partners \*AND\* *substantial* reductions in condom use with casual partners.
  - *VERY LARGE* (>20%) increases in partner change rate

## Conclusions (...cntd)

- Age targeting: young men/boys for long-term impact/ 20-29s for short-term
- Optimality will depend on time-scale considered and on age-pattern of acceptance.
- Targeting to this age-range will lead to more infections averted for the same number of operations.
- Infections averted per operation will increase over time, as indirect impact of intervention spreads through population

## Spare slides

## Output For Comparison Of Alternative Intervention Strategies

- **Cumulative infections averted?\***
  - Population size confounds
  - Successful intervention-> Less AIDS burden->Bigger Population->More infections despite lower incidence rate?
- **Incidence rate ratio at time  $t$ ?**
  - Risk distribution confounds?
  - No intervention -> highest risk depleted; average incidence dominated by incidence rate among low-risk groups
  - Successful intervention -> highest risk groups not depleted; average incidence biased upward?
  - Extent will depend on distribution of risk and assumptions made about ‘replacement’
- **Adjusted incidence rate ratio at time  $t$ ?**
  - Incidence rate measured in intervention simulation
  - Compare with incidence rate measured in control simulation – but standardising the risk distribution.
  - i.e. effectively “risk-matched” incidence rate ratio (“How much lower is incidence in the intervention simulation, for each demographic/risk group – then average”)
  - This used for most outputs...

\*NB. These measures OK if only interested in making “prediction” – not necessarily fair comparisons

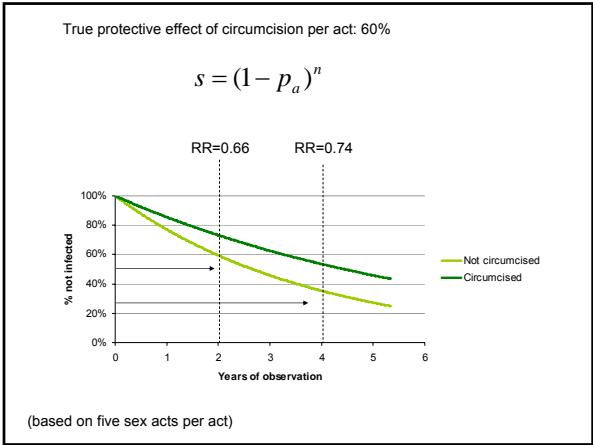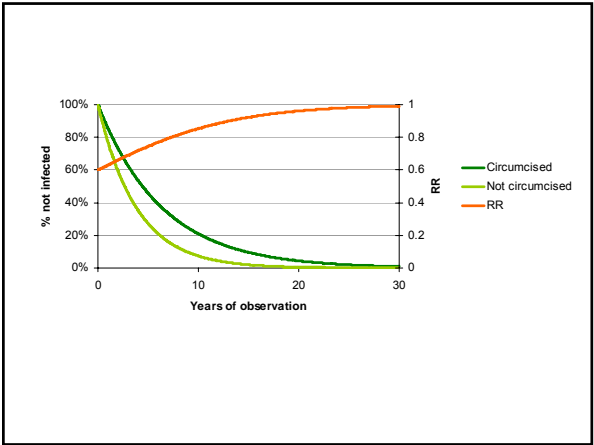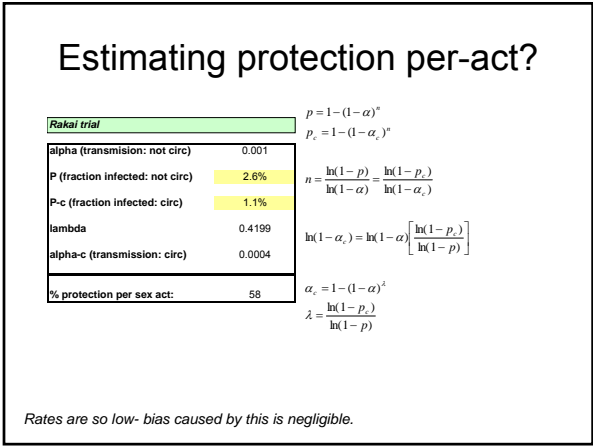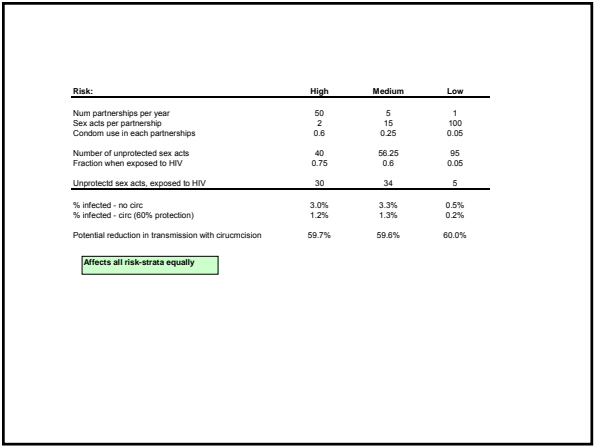

### Cost-Effectiveness of Male Circumcision for HIV Prevention in a South African Setting ... and beyond

Jim Kahn & Elliot Marseille, UCSF  
Bertran Auvert, University of Versailles

### Background

- RCT in Orange Farm showed a protective effect for adult male circumcision of 60%, consistent with observational studies.
- Resources for HIV prevention are limited, and the economics of a biological intervention of this type are unknown.

### Goals

- Assess the cost-effectiveness of MC for Gauteng Province, South Africa
- Use the analysis model to estimate cost-effectiveness in sub-Saharan African settings with different epidemiology or costs.

### MC CEA Outcomes

- HIV Infections averted
- Cost per HIV infection averted
  - Unadjusted for averted lifetime cost of HIV treatment
  - Adjusted for averted lifetime cost of HIV treatment

### MC CEA inputs

- Cost of each MC, including promotion
- Frequency and cost of side effects
- HIV prevalence and incidence in men
- Protective effect of MC
- Reduction of protective effect due to risk compensation
- Multiplier effects due to epidemic dynamics, e.g. protection to women
- Savings from medical costs averted

### CE base case input values

- MC \$55 each, mild side effects 5% / \$13, serious side effects 0.4% / \$334
- HIV prevalence 25.6%, incidence 3.8 /100/yr (> 18 y)
- Protective effect 60% female to male
- Risk compensation 25%
- Epidemic multiplier 1.5
- Not included: effect on male-to-female transmission risk & reduced cases in infants
- Lifetime cost of HIV treatment \$8000 (50% ART)
- 20 years



# Modeling

- **Intent:**
  - *Flexibly portray effects* over time on HIV infections averted and CE of: HIV prevalence & incidence, MC cost, MC protective effect, risk compensation, 2er benefits.
  - *Simplicity*: close to data, transparent.
  - *Uncertainty of modeling << key inputs*. Limitation: low granularity.
- **Tools:**
  - *Linear extrapolation* of averted infections as function of reduced annual incidence.
  - *Interval epidemic model* with 6 compartments (male circ'd / not, female; HIV infected / not).

# CE base case results

|                                                                       |                 |
|-----------------------------------------------------------------------|-----------------|
| Program cost per MC                                                   |                 |
| Cost of male circumcision                                             | \$ 54.72        |
| Cost of adverse events                                                | \$ 1.03         |
| Total cost                                                            | \$ 55.75        |
| HIV infections averted per MC                                         |                 |
| Undiscounted                                                          | 0.43            |
| Discounted                                                            | 0.31            |
|                                                                       | (3 MCs per HIA) |
| <b>Cost-Effectiveness</b>                                             |                 |
| Cost per HIV infection averted (unadjusted for averted medical costs) | \$181           |
| Net cost, adjusted for averted medical costs (savings)                | (\$2,411)       |

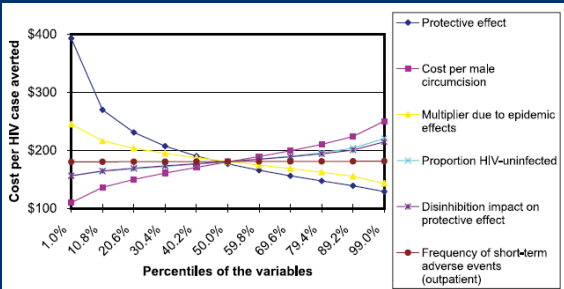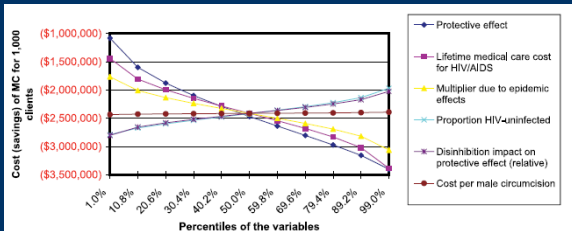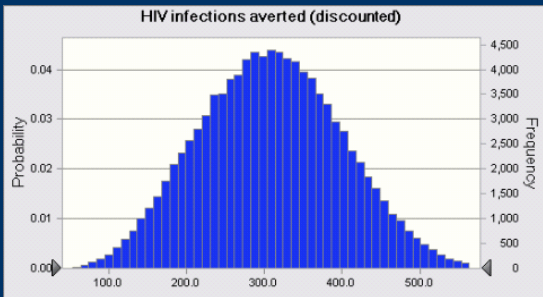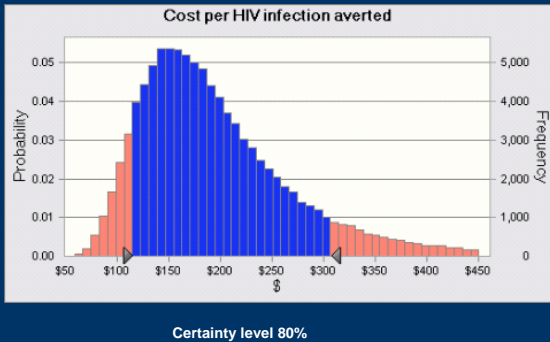

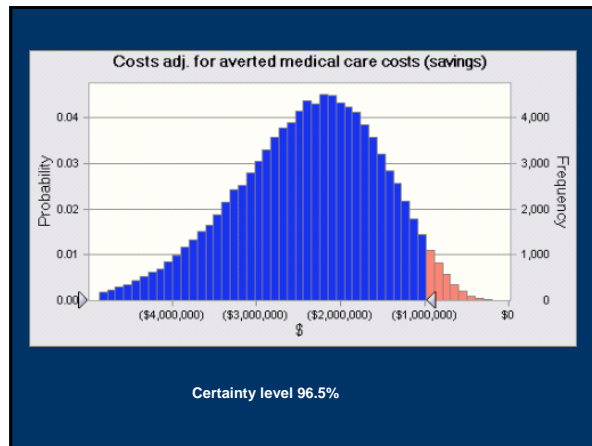

Table 3. Three-Way Sensitivity Analysis

| Multiplier Value          | Protective Effect | Cost per HIA (\$) in Three Unit Cost Groups |                |                 |
|---------------------------|-------------------|---------------------------------------------|----------------|-----------------|
|                           |                   | Unit Cost \$30                              | Unit Cost \$50 | Unit Cost \$100 |
| Epidemic multiplier = 1.0 | 40%               | 350                                         | 545            | 1,031           |
|                           | 50%               | 234                                         | 363            | 688             |
|                           | 60%               | 175                                         | 271            | 516             |
|                           | 70%               | 140                                         | 218            | 413             |
| Epidemic multiplier = 1.5 | 40%               | 234                                         | 363            | 688             |
|                           | 50%               | 156                                         | 242            | 458             |
|                           | 60%               | 117                                         | 181*           | 344             |
|                           | 70%               | 93                                          | 145            | 275             |
| Epidemic multiplier = 2.0 | 40%               | 175                                         | 273            | 516             |
|                           | 50%               | 117                                         | 182            | 344             |
|                           | 60%               | 88                                          | 136            | 258             |
|                           | 70%               | 70                                          | 109            | 206             |

(all => *net savings* when adjusted for averted medical costs)

## Alternate Epidemic Scenarios

- Base case: HIV prevalence 25.6%, incidence 0.038
- Lower steady state:** With HIV prevalence = 8.4% & incidence = 0.01, cost per HIA is \$551, with net savings of \$753 per MC.
- Declining epidemic:** With HIV prevalence = 25.6% but incidence = 0.01, cost per HIA is \$1200, with net savings of \$264 per MC.
- Focus on young men:** Age 18-24, HIV prevalence = 10% and incidence = 0.021, cost per HIA = \$135.

## Program Scenarios

- Recruitment at \$5 per eligible** but only 10% coverage => \$100 per MC performed, with net savings of \$253 per MC.
- To reach net cost of \$0**, cost per MC must rise 45-fold to \$2,466 (or protective effect must drop to 21%).
- Scale** has <1% effect on impact (might lower costs)

## Cost per HIV Infection Averted Across Prevention Interventions

- Adult MC** \$ 181
- VCT \$ 393 - 482
- PMTCT \$ 20 - 21,000
- Condoms \$ 11 - 2108
- Peer educa SWs \$ 68 - \$79
- Mass media \$ 58 (maybe)
- Rx of STI \$ 271-\$514 (if effective)
- School-based \$ 7,288 - \$13,326

## Bias

- Favorable:**
  - In epidemic model, we assume constant level of circumcision in cohort with replacement without ongoing cost. Impact lessened by discounting. Approx 1.5-fold bias. I.e., \$270 per HIA.
- Unfavorable :**
  - We costed MC for HIV+ (adds 33% in base case)
  - MC protective effect = 0.60; per receipt of MC = 76%.
  - Time horizon 20 years, so some censoring.
- Balance:**
  - Neutral?

## Conclusions

- Adult male circumcision in Sub-Saharan Africa **appears to save money** for a wide range of epidemic and economic conditions, and to **compare favorably in cost-effectiveness with other HIV prevention strategies**.
- Analyses should be **updated from operating programs** – costs (by MC delivery model: inputs, prices, efficiency in practice), complications, protective effect, risk compensation.

## Rakai modeling and beyond

Tom Lutalo  
Rakai Health Sciences Program

UNAIDS/WHO/SACEMA Consultation  
Making Decisions on Male Circumcision for HIV  
Risk Reduction: Modelling the Impact and Costs  
Stellenbosch, South Africa 15<sup>th</sup> Nov 2007

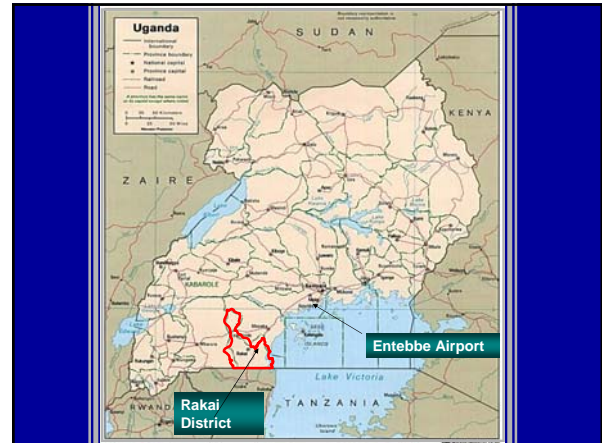

## Potential impact of male circumcision: Stochastic simulation model from Rakai

What is the potential effect of circumcision on:

- HIV incidence in the population
- Course of the HIV epidemic (reproductive #:  $R_0$ )
- Number of circumcisions needed to avert HIV infection
- Cost per HIV infection averted

## Study design and setting

- Based on data from a cohort in Rakai
- A stochastic model with empirically derived parameters used
  - Estimate the population-level incidence of HIV as a function of efficacy of male circumcision
- Rakai cohort has a mature generalized epidemic
  - Adult prevalence 11%
  - HIV incidence 1.24/100 py
- Probability of HIV transmission per sex act was computed

## Participants

- Age categories 15-24, 25-29, 30-34, 35+
- Gender specific rates of partner change based on Rakai cohort data
  - 8% of HIV-infected women &
  - 53% of HIV infected men , reported multiple partnerships in a given year
- In Rakai 84% of men were uncircumcised

## The Intervention

*Impact of MC on HIV incidence and cost per infection averted:  
A stochastic simulation model  
Gray et al AIDS 2007*

- Used empirical data on transmission probability by stage of disease and HIV viral load, age and gender
- Assumed Cx reduces HIV acquisition by an IRR of 0.3-0.6 in men, female partners and both sexes combined.
- An IRR of 0.7 for reduction in acquisition by women was also used.
- Assume varying circumcision coverage levels (0-100%) of HIV –ve uncircumcised men
- A cost per Circumcision of \$69 including post operative care.
- Projected incidence over 10 years
- The model simulated HIV transmission from an HIV positive to an HIV negative partner

### Primary Outcomes

- Estimates used to calculate cost and number of procedures required per HIV infection averted over a 10 yr period
- The epidemic reproductive number ( $R_0$ ) was estimated
- For behavioral disinhibition, estimates were derived for increasing numbers of sexual partners per individual (by 25%, 50% or 100%)

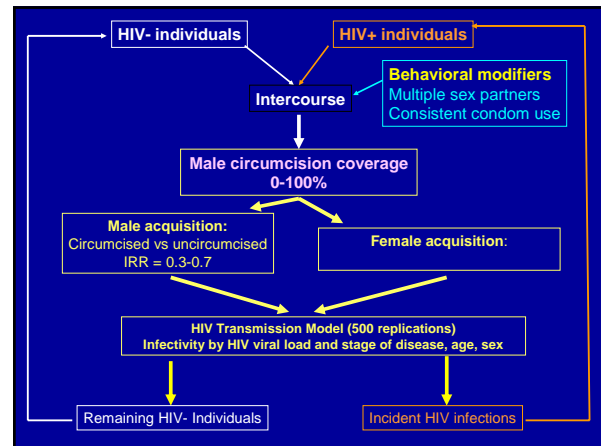

### Population HIV incidence by circumcision: reduction in male HIV acquisition, and program coverage

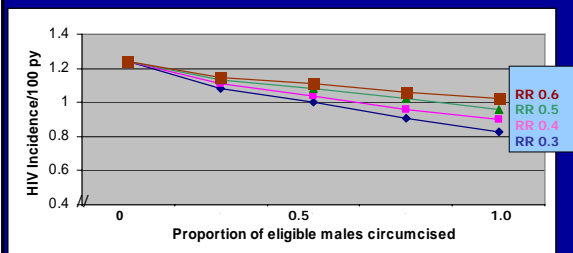

(Gray et al AIDS 2007)

 $R_0 \sim 1.0$  if coverage 100%

### HIV incidence and $R_0$ by efficacy of circumcision and 75% program coverage

| IRR | Male acquisition |       |
|-----|------------------|-------|
|     | Incidence        | $R_0$ |
| 0.3 | 0.91             | 1.01  |
| 0.5 | 1.02             | 1.14  |
| 0.6 | 1.16             | 1.27  |

Initial incidence 1.24/100 py,  $R_0 = 1.44$ 

### Effect of behavioral disinhibition on HIV incidence, by circumcision IRR in both sexes combined, 75% coverage

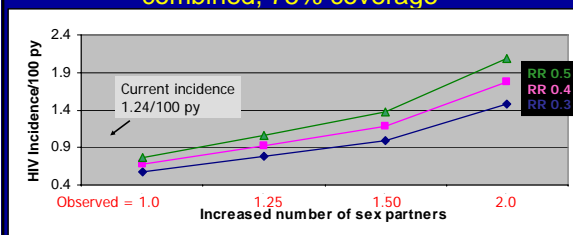

Behavioral disinhibition can offset all benefit, even at high circumcision efficacy

### Cost per infection averted

- Requires:
  - An estimate of the infections averted by circumcision over time, with varying efficacy and assumptions about coverage
  - Unit cost of surgery, postoperative and management of adverse events (~\$69.0 in Rakai trial)

### Estimates of number of surgeries per HIV infection averted in the trial

- Based on 24 month transmission risks of 2.6% in the control arm and 1.11% in the intervention arm. Risk difference 1.49%
- Infections averted =  $1/\text{risk diff} = 67$  surgeries per HIV infection averted over two years
- Rakai
  - HIV prevalence ~ 11%
  - Incidence in uncircumcised men ~ 1.3/100 py

### Cost of male circumcision for HIV prevention in Rakai

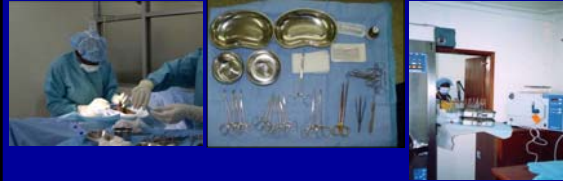

Rakai: Cost per circumcision ~ \$69.0 for surgery, postoperative care and AE management  
Research study using physicians, fully equipped theaters and disposables.  
Program costs are likely to be lower (assume \$35)

### Cost per infection averted in the trial

- Cost \$69 per surgery
- Surgeries per HIV infection averted = 67
- Cost per infection averted = \$4623
  - Ignores possible secondary reduction in transmission to female partners
  - Does not account for long term effects of MC
  - Need to consider the population of uncircumcised men and program coverage
  - Need simulation modeling

### Number of circumcisions to prevent one incident HIV infection over 10 years with 75% program coverage

| Efficacy (1-IRR) | No. Surgeries per infection averted over 10 years |
|------------------|---------------------------------------------------|
| 0.7              | 31                                                |
| 0.5              | 46                                                |
| 0.4              | 58                                                |

### Cost per infection averted over 10 years with 75% program coverage Research Cost \$69 per surgery

| Efficacy | Cost per infection averted (\$) |
|----------|---------------------------------|
| 0.7      | 2125                            |
| 0.5      | 3136                            |
| 0.4      | 3911                            |

### Cost per infection averted over 10 years with 75% program coverage Cost \$35 per surgery

| Efficacy | Cost per infection averted (\$) |
|----------|---------------------------------|
| 0.7      | 1078                            |
| 0.5      | 1591                            |
| 0.4      | 1984                            |

### Caveats

- Costs per infection averted are high in Rakai due to relatively low incidence and prevalence in this rural setting
  - HIV prevalence = 11%
  - HIV incidence = 1.3/100 py in uncircumcised men
- Costs per infection averted will be lower if
  - HIV prevalence and incidence are high (e.g., SA)
  - Few men are circumcised, and program coverage is high
  - Efficacy of circumcision ~ 0.5
  - Longer time projection (e.g., 20 years)

### Limitations and strengths

- Limitations:
  - This model is specific to Rakai epidemiologic parameters
  - Trial data on MC efficacy is only known over 2 years. Efficacy may increase with longer time from surgery (Rakai trial efficacy in 2<sup>nd</sup> year of follow up was 75%)
- Strengths:
  - Model is based on empirical data with minimum assumptions
  - Model output closely approximates to observed rates (e.g. HIV incidence), suggesting the model accurately reflects the Rakai epidemiology
  - Efficacy based on trial outcomes

### Modeling Conclusions

- Male circumcision may potentially:
  - Reduce HIV incidence in the population
  - Reduce  $R_0$  ~1
  - The number of surgeries per HIV infection averted is likely to be cost-effective,
- The effects of MC will depend on:
  - Efficacy in males
  - Effects in females unknown (depends on trial results)
  - Duration of efficacy
  - HIV incidence
  - Prevalence of MC
  - Program coverage of uncircumcised males
  - Prevention of disinhibition

### Follow-up Study, Post trial Surveillance in Rakai (NIH)

- Provide circumcision surgery to uncircumcised, control participants
- Continue with analysis to demonstrate efficacy of circumcision to prevent STIs
- Conduct long-term, post trial surveillance to assess effectiveness of circumcision, monitor sexual risk behaviors and estimate number of surgeries required to avert one HIV infection over five years

### Museveni Cautions Youth on Circumcision

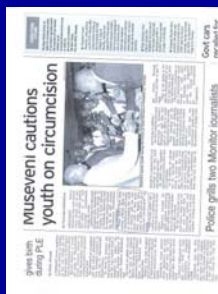

### The advise

- “Some NGOs have been saying rubbish about circumcision but I will continue encouraging the youth to abstain and use condoms only if they must. How many Bagisu have died of AIDS and yet all of them are circumcised” he asked.

*Thank you*  
*Acknowledgements:*  
*Ron Gray*  
*Maria Wawer*  
*David Serwadda*  
*Nelson Sewankambo*  
*Fred Wabwire-Mangen*  
*Godfrey Kigozi*  
*Steven Watya*  
*Fred Makumbi*  
*Fred Nalugoda*  
*Steve Reynolds*  
*Rakai Health Sciences Program Study Teams*



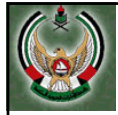

## Nyanza (Kenya) Modelling Approaches

Nico Nagelkerke<sup>1,2</sup>  
Robert Bailey<sup>3</sup>  
Steve Moses<sup>2</sup>

1. Dept Community Medicine, United Arab Emirates University, Al Ain, UAE  
2. Dept of Medical Microbiology, University of Manitoba, Winnipeg, Canada  
3. Division of Epidemiology, University of Illinois at Chicago, Chicago, USA

## Nyanza Province (Kenya)

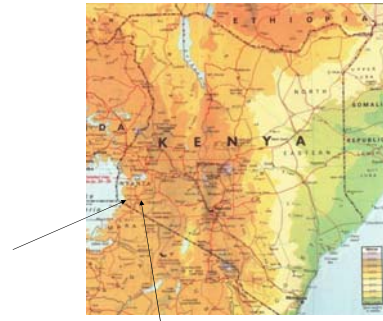

## Nyanza Province

- The provincial capital is [Kisumu](#), the third largest city in Kenya.
- The province has a population of 4,392,196 (as of 1999) within an area of 16,162 km<sup>2</sup>. Largely agricultural
- Population is
  - 3 million Nilotic (not Bantu), their native language is Luo (Kiswahili and English learnt in school).
  - 1.5 million Kisii (Gusii), bantus
- Male circumcision is not widely practiced among Luos (unlike most other ethnic groups in Kenya)

## HIV prevalence over time

- Has the highest HIV prevalence of all Kenyan provinces
  - Variable estimates, all highest in Kenya
  - 20% in men, 30% women (Buvé, AIDS 2001)
  - Women 15-49:18.3%; Men 15-49 11.6%; Kenya 8.7%, and 4.7% (DHS 2003)
- Kisumu (Luo) pregnant women
  - 19.6% (1993)-29.5% (1998; WHO/UNAIDS)

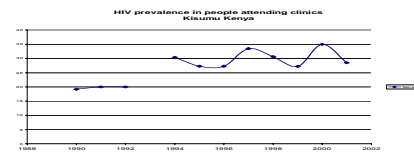

## Valley of Life or Death

- High rates of HIV in Luo (Nyanza) compared to neighbouring Luya (Western) was subject of BBC documentary "The valley of Life or Death" (Nov. 2000) which made the circumcision issue widely known
  - *So here in this valley, although the two groups should have the same risk, the people on one side have a 20% HIV infection rate and the people on the other 7%.*

## HIV in Nyanza

- In addition to non-circumcision there are other Luo habits that are risk factors for HIV transmission
  - "Cleansing" of widows
  - When a man dies, one of his brothers or other male relatives is required to step in
  - Unsafe sex between FSW and clients common
    - As elsewhere in Kenya

### Clinical Trial on MC in Nyanza

RC Bailey et al; *Lancet*. 2007.

- Now 3 trials (Auvert, Gray, Bailey) have shown 50-60% reduction in HIV infection risk after male circumcision
- In Kisumu 22/1391 in intervention vs 47/1393 in control group seroconverted
  - 53%-60% risk reduction rates
    - Men 18-24 years old
    - Baseline screening 537/6159 (8.7%) positive/indeterminate
    - Incidence in control group approx. 2%/year
    - 21 adverse events resolved quickly
    - No behavioral risk compensation (disinhibition) observed

### Modelling

- Two approaches
  - Random (proportionate) mixing model
  - Compartmental Model
- *BMC Infectious Diseases* 2007, 7:16

### Random Mixing Model

- Only equilibrium ("statics") explored, 60% reduction in risk. MC from 0 to 100%
- Used 2-gender Anderson-May model; extended Dushoff's work to calculate equilibrium prevalences
- Distribution  $N(x)$  of  $x$  (scaled) mixing rates  $x = \beta cD$ , moments  $N^1, N^2$ , Of these  $I(x)$  infected
- Equilibrium:  $I_m(x) = x \Lambda^i (N_m(x) - I_m(x))$
- $R_0^2 = N_m^2 N_f^2 / N_m^1 N_f^1$
- Gamma distributed mixing rates assumed (long tails)
  - Different levels of heterogeneity
- Mathematica used to do calculations

$$I^m(x) = \frac{x \Lambda^i N^m(x)}{1 + x \Lambda^i} \quad \Lambda^m = \frac{\int_0^\infty x I^m(x) dx}{\int_0^\infty x N^m(x) dx}$$

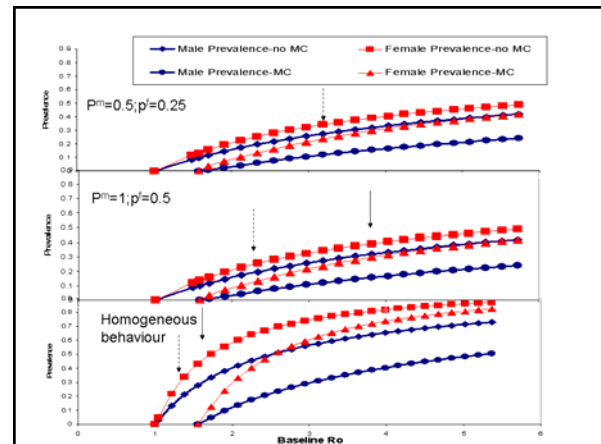

### Compartmental Model

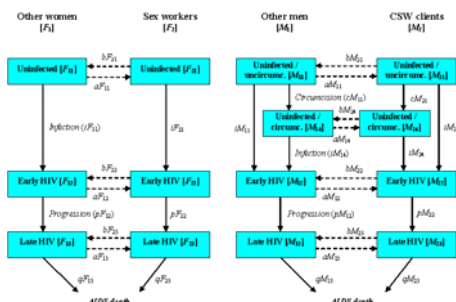

### Details

- MC introduced in 2010, but 10% pre-intervention level of MC assumed
  - i.e. includes only Luo
- Rates of circumcision set to obtain specific levels (50%, 80%)
- Parameters gleaned from literature + fitting

## Sensitivity Analyses

1. Base RR = 0.40;
2. Sensitivity studies:
  - RR = 0.25, 0.60
  - Disinhibition (risk compensation): no condom use during FSW-clients contacts
  - Effect of circumcision on M-F transmission (25% Risk Reduction). But evidence for this effect is still poor

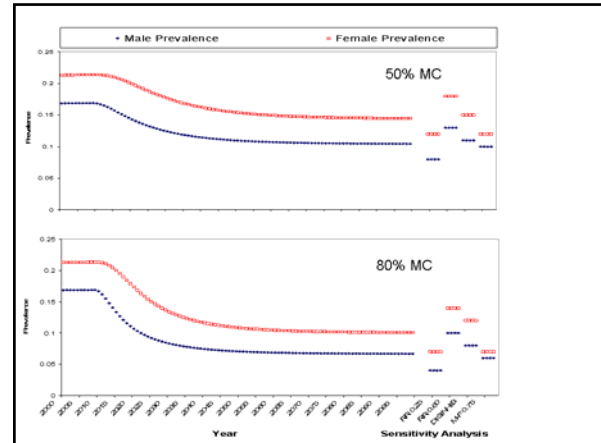

## Cost-effectiveness

- MC can increase life expectancy in high prevalence countries by 5-10 years
- When fully operational will avert approximately 10,000 (50% uptake)-15,000 (80% uptake) HIV infections annually
  - But depends on time of MC (pre-puberty is best)
- Programme in equilibrium would require approximately 30,000-45,000 (2-3% of 1.5 million men) MC/year
- If costs/MC \$50-100, then costs per HIV infection averted \$150-400.
  - Per capita costs +/- 1 \$/year
  - Per life-year saved \$7-20 (assuming conservatively 20 extra years)
- Cost effectiveness much higher than ART
  - US\$984 (95% CI 913-1,078) per life year gained in RSA (Cleary et al, 2006); 100 times less cost-effective!

## Acceptability in Nyanza

- Will male circumcision be an acceptable intervention?
  - Considered (culturally) acceptable (Bailey, AIDS Care 2002)
  - But also meets with resistance. Quotes from "The Standard" 11-08-2007
    - Luo Council of Elders will have none of it: *Promoting male circumcision as a tool to prevent HIV/Aids infections, says Riaga, will fuel prostitution, as people will indulge in careless sex.*
    - KMA chairman Dr Stephen Ochiel says, "Attitude change should be the best recommendation. Some men believe circumcision gives them a leeway to have multiple partners," says Ochiel.

## Discussion

- Male circumcision with high coverage may lead to > 50% reduction in HIV prevalence
  - Highly cost-effective
- May take 1-2 decades to take full effect
  - But faster if "catch-up" campaigns organized
- Effect larger in men than in women
- Assumed fixed reduction in risk per contact
  - Heterogeneity in susceptibility will lead to higher reduction in *conditional* risk, and thus....
  - Those least susceptible will benefit relatively most (cf. Rakai study). Supported by empirical data:
    - Rakai: 0 of 50 circumcised men with infected spouses became HIV-infected after nearly 2 years of follow-up, whereas 40 of 137 of uncircumcised seroconverted

**USAID** FROM THE AMERICAN PEOPLE | **HEALTH POLICY INITIATIVE**

## Cost of Male Circumcision and Implications for Cost-Effectiveness of Circumcision as an HIV Intervention

Study Team\*: Lori Bollinger<sup>2</sup>, Steven Forsythe<sup>2</sup>, Bafana Khumalo<sup>2</sup>, Gavle Martin<sup>1</sup>, Rejoice Nkambule<sup>4</sup>, Tanvi Pandit-Rajani<sup>1</sup>, Dean Peacock<sup>3</sup>, Tshehlo Relebohile<sup>3</sup>, John Stover<sup>2</sup>

June, 2007; Updated November 2007

<sup>1</sup> Constella Futures  
<sup>2</sup> Futures Institute  
<sup>3</sup> Lesotho Ministry of Health and Social Welfare  
<sup>4</sup> Swaziland Ministry of Health and Social Welfare  
<sup>5</sup> Sonke Gender Justice

1a  
\*alphabetical order

**USAID** FROM THE AMERICAN PEOPLE | **HEALTH POLICY INITIATIVE**

## Study Components

1. Understanding the social, cultural and policy context
2. Costing Male Circumcision
3. Modeling the Impact

2

**USAID** FROM THE AMERICAN PEOPLE | **HEALTH POLICY INITIATIVE**

## What the study will not tell you ...

- Whether circumcision should be implemented in the selected countries ...
- How circumcision should be implemented in the selected countries ...
- What the clinical guidelines should be ...
- Who should perform male circumcision ...

*The study is intended to provide some information (alongside other considerations) that will feed into country-led policy and planning processes*

3

**USAID** FROM THE AMERICAN PEOPLE | **HEALTH POLICY INITIATIVE**

## Methodology

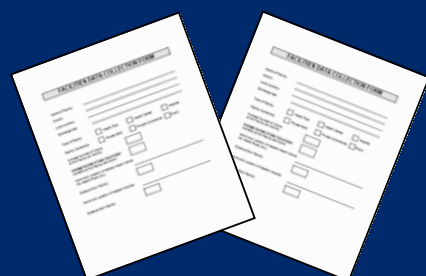

4

**USAID** FROM THE AMERICAN PEOPLE | **HEALTH POLICY INITIATIVE**

## Key considerations in design

- Study focuses on adult circumcision only
- From the perspective of the health facility
- Cost data collected on how circumcision currently implemented
- Consideration also given to services not currently part of circumcision (counseling with or without testing, training, communications)
- 3 countries
  - Allows for standardization, comparison and validation
  - Countries: high HIV prevalence; moderate to low MC prevalence (Williams et al 2006)

5

**USAID** FROM THE AMERICAN PEOPLE | **HEALTH POLICY INITIATIVE**

## Key considerations in design

- Variation in circumcision practices and patient management made explicit and costed accordingly
- Several provider types considered and levels of health facilities
  - Public and NGO/FBO
  - District hospital, referral hospital and clinic
- Ingredients approach to costing
  - Allows for flexibility in use of the cost analysis
  - Enables specific aspects of intervention to be added or subtracted to inform planning

6



| Facility                                       | 1 | 2 | 3 | 4 | 5 | 6 | 7 | 8 | 9 | 10 | 11 |
|------------------------------------------------|---|---|---|---|---|---|---|---|---|----|----|
| Visit #1 (initial visit, examination, booking) |   |   |   |   |   |   |   |   |   |    |    |
| Doctor (minutes)                               |   |   |   |   |   |   |   |   |   |    |    |
| Nurse (minutes)                                |   |   |   |   |   |   |   |   |   |    |    |
| Counselor (min)                                |   |   |   |   |   |   |   |   |   |    |    |
| Visit #2 (surgical procedure)                  |   |   |   |   |   |   |   |   |   |    |    |
| Doctor (minutes)                               |   |   |   |   |   |   |   |   |   |    |    |
| Nurse (minutes)                                |   |   |   |   |   |   |   |   |   |    |    |
| Nurse Ast (minut)                              |   |   |   |   |   |   |   |   |   |    |    |
|                                                |   |   |   |   |   |   |   |   |   |    |    |
|                                                |   |   |   |   |   |   |   |   |   |    |    |
| Visit #3 (post-surgery follow-up; +2-3 days)   |   |   |   |   |   |   |   |   |   |    |    |
| Doctor (minutes)                               |   |   |   |   |   |   |   |   |   |    |    |
| Nurse (minutes)                                |   |   |   |   |   |   |   |   |   |    |    |
|                                                |   |   |   |   |   |   |   |   |   |    |    |
| Visit #4 (follow-up; +7 days)                  |   |   |   |   |   |   |   |   |   |    |    |
| Nurse (minutes)                                |   |   |   |   |   |   |   |   |   |    |    |

| Facility                                       | 1            | 2            | 3            | 4            | 5           | 6           | 7           | 8           | 9            | 10           | 11           |
|------------------------------------------------|--------------|--------------|--------------|--------------|-------------|-------------|-------------|-------------|--------------|--------------|--------------|
| Visit #1 (initial visit, examination, booking) |              |              |              |              |             |             |             |             |              |              |              |
| Doctor (minutes)                               |              |              |              |              |             |             |             |             |              |              |              |
| Nurse (minutes)                                |              |              |              |              |             |             |             |             |              |              |              |
| Counselor (min)                                |              |              |              |              |             |             |             |             |              |              |              |
| Visit #2 (surgical procedure)                  |              |              |              |              |             |             |             |             |              |              |              |
| Doctor (minutes)                               |              |              |              |              |             |             |             |             |              |              |              |
| Nurse (minutes)                                |              |              |              |              |             |             |             |             |              |              |              |
| Nurse Ast (min)                                |              |              |              |              |             |             |             |             |              |              |              |
| Anesthesia                                     | Local        | Local        | Local        | Local        | Local       | Local       | Local       | Local       | Local        | Local        | Local        |
| Antibiotics                                    | None         | None         | None         | None         | Penicil lin | Penicil lin | None        | None        | None         | None         | None         |
| Analgesics                                     | Parac etamol | Parac etamol | Parac etamol | Parac etamol | Ibupro phen | Ibupro phen | Ibupro phen | Ibupro phen | Parac etamol | Parac etamol | Parac etamol |
| Visit #3 (post-surgery follow-up; +2-3 days)   |              |              |              |              |             |             |             |             |              |              |              |
| Doctor (minutes)                               |              |              |              |              |             |             |             |             |              |              |              |
| Nurse (minutes)                                |              |              |              |              |             |             |             |             |              |              |              |
| Dressing                                       | No           | Yes          | No           | Yes          | Yes         | Yes         | No          | No          | No           | No           | No           |
| Visit #4 (follow-up; +7 days)                  |              |              |              |              |             |             |             |             |              |              |              |
| Nurse (minutes)                                |              |              |              |              |             |             |             |             |              |              |              |

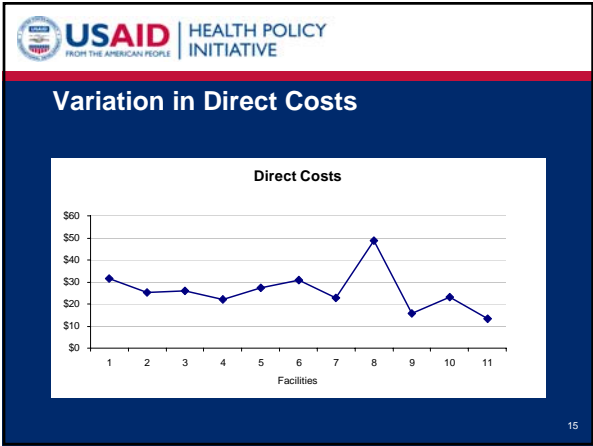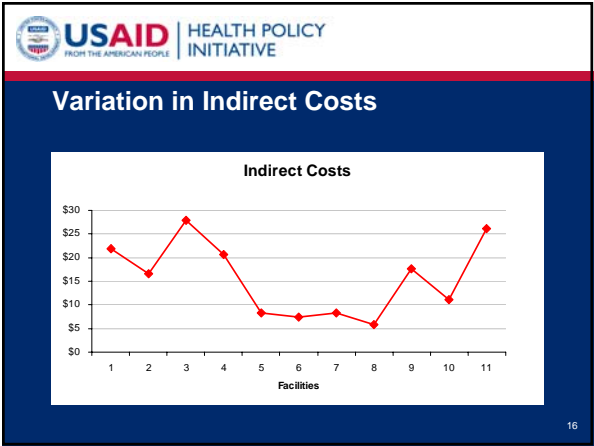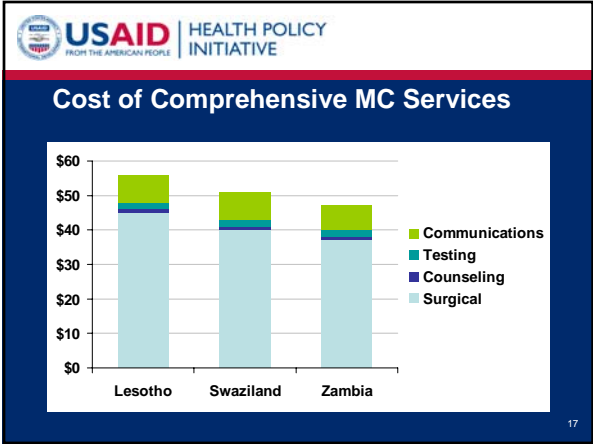

- USAID HEALTH POLICY INITIATIVE
- ### Factors that explain differences in Unit Costs
- General convergence in surgical practice in non-private providers
  - Small variation:
    - whether or not antibiotics are routinely prescribed
    - whether or not dressings are reapplied at the post-operative visit
  - Commodity costs not an important source of variation
  - Indirect costs are an important driver of cost differences:
    - level of facility (size, complexity of services available etc.)
- 18

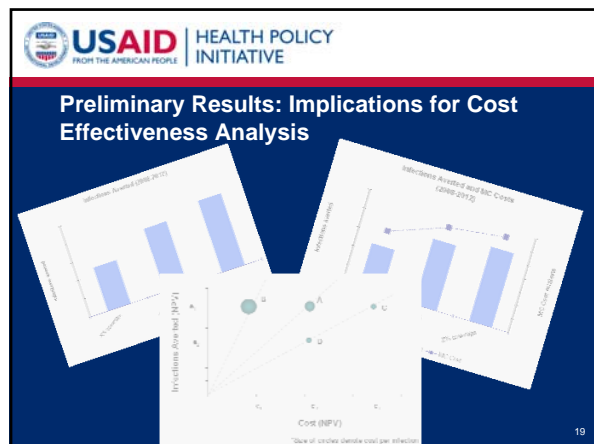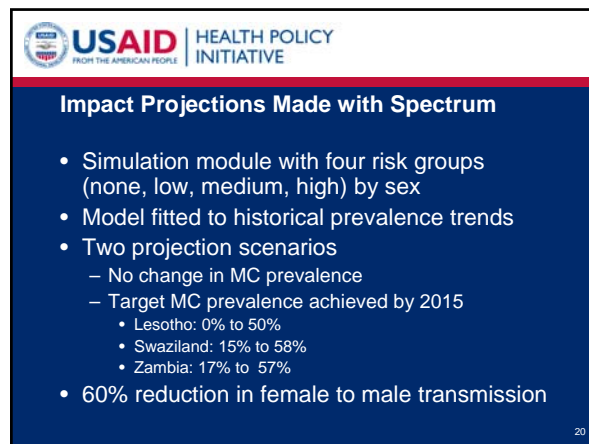

**USAID HEALTH POLICY INITIATIVE**

### Scaling up MC (2008-2020)

|                             |           | Lesotho | Swaziland | Zambia |
|-----------------------------|-----------|---------|-----------|--------|
| MC Target for 2015          |           | 53%     | 58%       | 58%    |
| MCs per infection averted   | 2008-2020 | 6.1     | 4.1       | 8.0    |
| Cost per infection averted* | 2008-2020 | \$292   | \$176     | \$313  |

\*Real discount rate = 3% 21

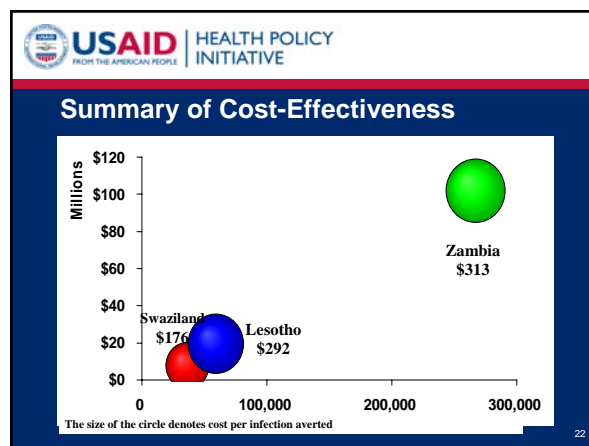

**USAID HEALTH POLICY INITIATIVE**

### Health service implications (Average for 2008-2020)

|                                    | Lesotho        | Swaziland     | Zambia        |
|------------------------------------|----------------|---------------|---------------|
| # MC per month                     | 2289           | 941           | 14,014        |
| # MC per week                      | 572            | 235           | 3234          |
| # MC per day                       | 114            | 47            | 461           |
| Average annual cost of MC*         | \$1.5 million  | \$0.6 million | \$7.9 million |
| Cumulative cost of MC (2008-2020)* | \$20.0 Million | \$7.8 Million | \$102 million |

\*Real discount rate = 3% 23

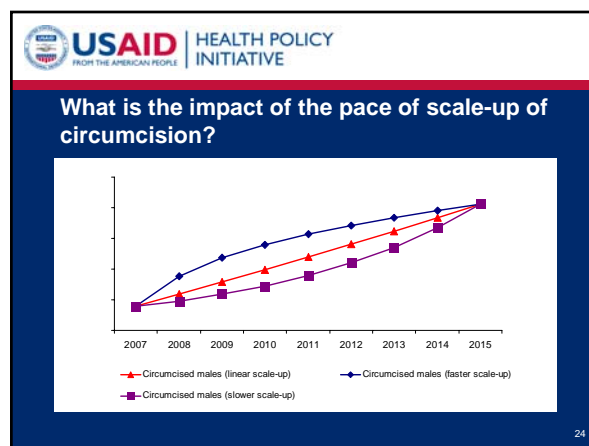

|  <b>USAID</b> HEALTH POLICY INITIATIVE<br><small>FROM THE AMERICAN PEOPLE</small> |                 |                                   |                 |
|--------------------------------------------------------------------------------------------------------------------------------------------------------------------|-----------------|-----------------------------------|-----------------|
| What is the impact of the pace of scale-up of circumcision?                                                                                                        |                 |                                   |                 |
| <i>Swaziland</i>                                                                                                                                                   |                 |                                   |                 |
|                                                                                                                                                                    | Linear scale-up | Slower scale-up                   | Faster scale-up |
|                                                                                                                                                                    | 2008-2015       | % difference with linear scale-up |                 |
| # MCs                                                                                                                                                              | 332,639         | -6%                               | +9%             |
| # Infections averted                                                                                                                                               | 43,782          | -18%                              | +31%            |
| Cost per IA*                                                                                                                                                       | \$437           | +15%<br>(\$480)                   | -16%<br>(\$350) |

\*Real discount rate = 3% <sup>25</sup>

|  <b>USAID</b> HEALTH POLICY INITIATIVE<br><small>FROM THE AMERICAN PEOPLE</small>                                                                                                                                                                                                                                                                                                                                                                                                                                                                        |  |
|-------------------------------------------------------------------------------------------------------------------------------------------------------------------------------------------------------------------------------------------------------------------------------------------------------------------------------------------------------------------------------------------------------------------------------------------------------------------------------------------------------------------------------------------------------------------------------------------------------------------------------------------|--|
| Conclusion                                                                                                                                                                                                                                                                                                                                                                                                                                                                                                                                                                                                                                |  |
| <ul style="list-style-type: none"> <li>• Level in the health service where MC is provided matters</li> <li>• Pace of scaling up matters</li> <li>• MC can be a cost effective intervention</li> <li>• Benefits accrue over time</li> <li>• Scaling up MC is not without challenges ...               <ul style="list-style-type: none"> <li>– Indirect costs should not be underestimated</li> <li>– Health service, financial and human resource implications are significant but not insurmountable</li> <li>– Innovative ways have to be found to involve all providers (including the private sector and NGOs)</li> </ul> </li> </ul> |  |

<sup>26</sup>



## Decision-Maker's Tool

John Stover and Lori Bollinger

Prepared for:  
UNAIDS/WHO/SACEMA Consultation  
Making Decisions on Male Circumcision for HIV Risk  
Reduction: Modelling the Impact and Costs

Stellenbosch, South Africa – 15-16 November 2007

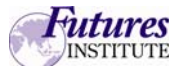

## Purpose

- Allow decision-makers to understand the cost and impact of scaling-up MC services
- Understand the effects of:
  - Service delivery approach
  - Target populations
  - Pace of scale-up

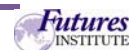

## Decision-makers Tool: Costing portion

- Based on LSZ costing work
  - Field-tested / applied in 3 countries
  - Similar to CostIt model (WHO-CHOICE)
- Three components:
  - 1. Questionnaire
  - 2. Costing template (Excel)
  - 3. Policy screen (Excel)

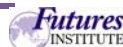

## 1. Questionnaire

- Facility section (facility id, # clients)
- Staffing, equipment, maintenance
  - Including transport & utility costs
- Procedure-related (includes staff, drugs, supplies, lab costs)
  - Circumcision procedure, including counseling/testing
  - Post-circumcision care – normal
  - Post-circumcision care – complications (infection, excessive bleeding, excessive pain, other)

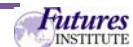

## 2. Costing template (Excel)

- Contains default assumptions on prices and quantities
  - Input cost worksheets are separate from quantity worksheets
  - Input cost data available at national level
  - Amortization included for capital costs
- Costs for following WHO/UNAIDS MC guidelines are imputed and included
  - HIV testing & counselling
  - IEC campaign

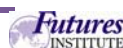

## 3. Policy screen (Excel)

- % MCs provided by different service delivery modes
  - Public hospital/clinic, NGO hospital, private provider, mobile clinic
- User fee amount (default = \$0) can be filled in by delivery mode

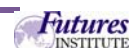

## Representative unit costs by service delivery mode

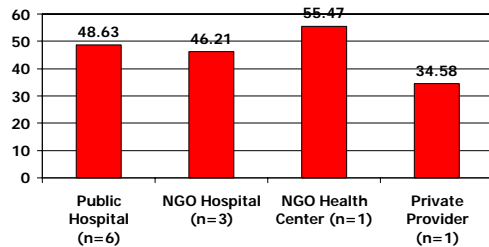

## Outstanding issues

- Current guidelines are incorporated into workbook – should they be made policy variables?
  - Provides focus on 'other' elements
- Any other policy variables that should be included?
- Other issues?

## Impact Model - Aggregate

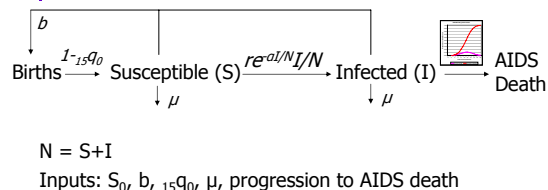

## Fitting the Model

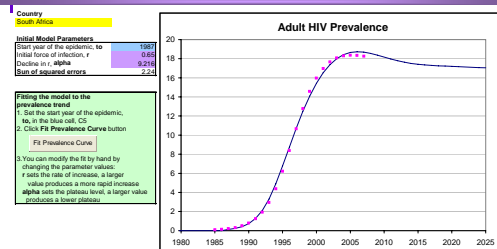

## Fitting the Model

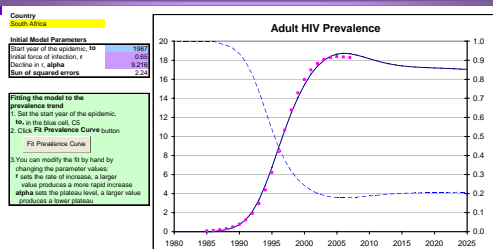

## Influence of MC

MC Inputs: reduction in transmission due to MC  
( $1 - r_{MC} / r_{NoMC}$ )

Fit parameters:  $a, r'$

Since  $r' = r_{NoMC}MC\%_0 + r_{MC}(1-MC\%_0)$

Calculate:  $r_{NoMC}$  and  $r_{MC}$

$r_t = r_{NoMC}MC\%_t + r_{MC}(1-MC\%_t)$

# Impact Model – Age and Sex

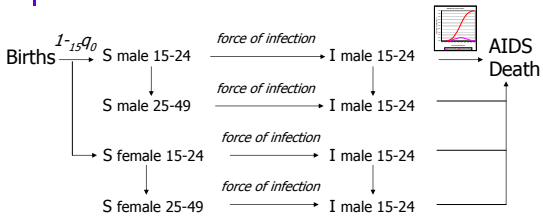

Force of infection by age and sex is a function of  $r_{A,S,C}$ , average risk, proportion of contacts with 15-24 and 25-49 of opposite sex and HIV prevalence in opposite sex.

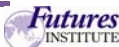

# Extra Inputs Required for Age and Sex Model

- $\mu$ , non-AIDS mortality by age and sex
- Initial population by age and sex
- Prevalence by age and sex over time
  - Generally only available for one year
- Sexual mixing matrix

| Age/Sex    | Female 15-24 | Female 25-49 | Total |
|------------|--------------|--------------|-------|
| Male 15-24 | 0.09         | 0.20         | 0.29  |
| Male 25-49 | 0.23         | 0.48         | 0.71  |
| Total      | 0.32         | 0.68         | 1.00  |

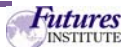

# Fitting the Age/Sex Model

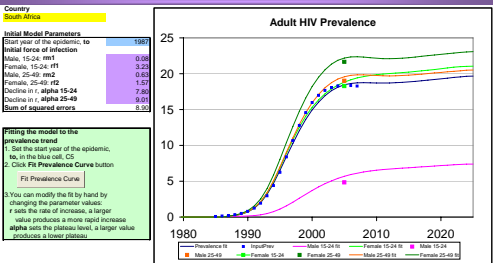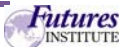

# Interactive Decision Screen

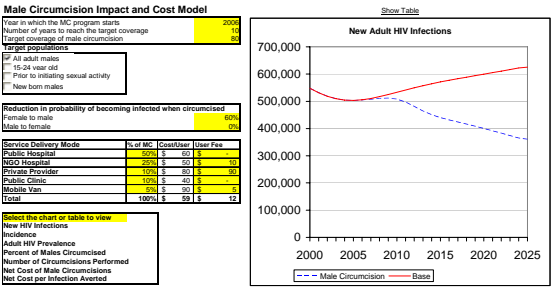

# Target = 80% Adult Males by 2015

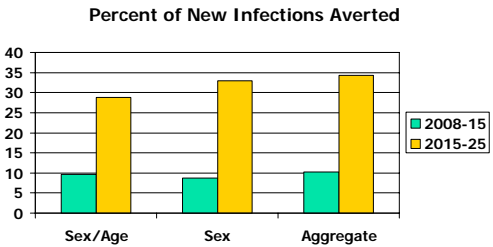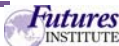

# Target = 80% 15-24 Males by 2015

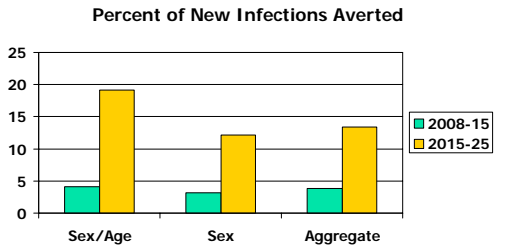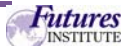

## Issues for Discussion

---

- Which model?
  - Aggregate model is easier to set up
    - But we could set up age/sex model for all relevant countries
  - Age/sex model may not be more accurate if data are not available
- Do we need additional population targeting and service delivery options?

## Male circumcision for HIV prevention: who, what, when?

UNAIDS/ WHO/  
SACEMA  
Consultation,  
Stellenbosch,  
2007

Richard White  
and colleagues

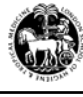

## Background

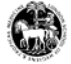

- Male circumcision important in explaining the heterogeneous spread of HIV in Africa
- MC reduces HIV acquisition in men by ~60%
- UNAIDS recommends MC should be scaled up in countries with high prevalence heterosexual HIV epidemics with **priority given to young HIV- males** and high risk groups
- MC is **not currently recommended for HIV+ males** because of concerns over ↑ risks to F if sex resumed before wound healing
- Questions**
  - What is population level impact?
  - How does this vary by age, sex, coverage and time to scale-up?
  - How much **risk compensation** would negate impact?
  - Impact of (inadvertently?) circumcising **HIV-infected** males?
    - Impact if circ lowers M>F HIV trans. prob.?

## Aim and objectives

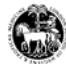

- Explore the population level impact of various scenarios of the rollout of MC in an urban population in East Africa
  - Estimate the **population level impact** of a linear increase in the proportion of circumcised **HIV-uninfected males** in the targeted age groups
    - from 25% (pre-intervention prevalence) to 75% over 5 years,
    - with **no risk compensation**
  - Estimate impact of varying the **coverage** and **time to scale-up**
  - Estimate magnitude of **risk compensation** required to negate impact of the plausible MC intervention, and the potential of increased condom use (due to counselling) to increase impact
  - Estimate population level impact of **inadvertently circumcising HIV infected males**

## Methods and assumptions (1)

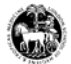

- Individual-level stochastic model STDSIM**
  - simulates the spread of HIV and STIs
  - dynamic sexual network of simulated individuals and their sexual contacts
  - Present average of 500 iterations per scenario
- Baseline scenario**
  - Fitted to the demographic, behavioural and epidemiological characteristics of the urban population (Kisumu) in East Africa in 1997 and 2006, and the impact of MC measured in young men in the Kisumu RCT (59%, 95% CI=30-76)
  - 25% of males already circumcised

## Circumcision assumptions

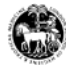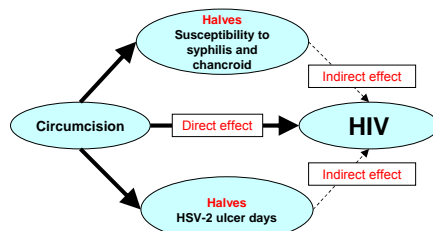

- HIV- M:** ► reduced susceptibility to HIV acquisition (fitted to RCT)  
► double the risk of acquisition from HIV+ F over 6m in 15% M who resume sex before healing
- HIV+ M:** ► double risk of transmission to F over 6m, in 15% of men who resume sex before healing (only direct effect on M to F)

## Methods and assumptions (2)

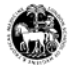

- Intervention scenarios**
  - Intervention starts 1<sup>st</sup> January 2007
- Default scenario**
  - Linear increase in proportion of HIV **uninfected** males in targeted age group from 25% to 75% over 5 years
  - no risk compensation
  - Target age groups: 15-24y, 25-34y, 35-49y, 15-49y, 15+y, All-ages, neonates and 13 year olds
- Outcomes**
  - Impact on HIV incidence (%) :  
= (1 - mean IRR among MF 15-49 years old ) \* 100
  - Number of HIV infections averted (MF 15-49y)/ 1000 circumcisions in males and females of all ages
  - Over 2,5,10,20,30,40 and 50 years

## Methods and assumptions (3)

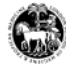

- Alternative scenarios
  - Coverage of HIV negatives varied between 25% (no increase) and 100%
  - Scale-up period varied between 0 and 20 years
  - Behaviour change
    - In default scenario condoms are used in 40% of casual and sex-contacts after 2000, with 10% failure
    - Vary condom use between 0-30% (risk compensation) and 50-80% (effective safe-sex counselling) in
      - Recently circumcised men
      - All circumcised men (including 25% already circumcised)
  - Direct effect on M to F HIV transmission probability
    - Assume 50% reduction

## Methods and assumptions (4)

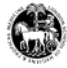

- Alternative scenarios continued
  - Effect of circumcising HIV infected males
    - Circumcise 15-49 year old males regardless of HIV status
      - With and without assuming circumcising males halves the male-to-female transmission probability of HIV
    - Keep number of circumcisions over each time period equal to that modelled in default scenario

## Results: Baseline scenario

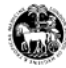

### Population structure by age and sex

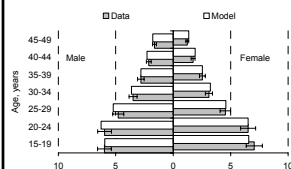

### Prevalence of steady partnerships

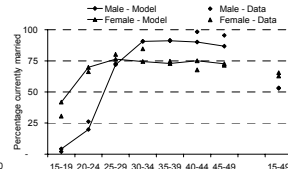

## Results: Baseline scenario

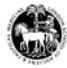

### STI prevalence

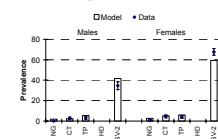

### HIV prevalence trend

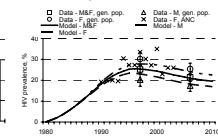

### HIV prevalence by age - Males

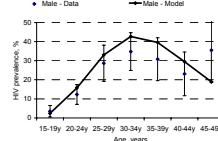

### HIV prevalence by age - Females

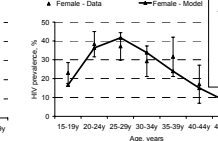

Age difference in casual and steady partnerships:  
Data: 5 years  
Model: 6.6 years

## Results: Fitted RCT impact in young men

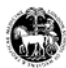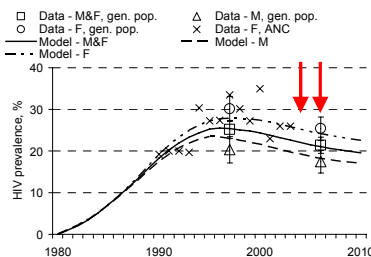

### Intention-to-treat impact\* (1-IRR) %:

Model 59(30-76) Data 59(30-76)

### Explained by:

Direct ~ 96%  
HSV-2 ulcer ~ 4%  
TP/HD acq. ~ 0%

\* Excluding 4 individuals subsequently known to be HIV+ at baseline. Bailey, R. C., et al (2007). Lancet 369(9562): 643-56.

## Population level impact: Targeting by age (1 - mean IRR over period) \* 100 (15-49 year olds, %)

### Males

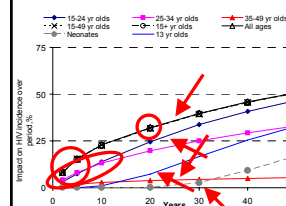

### Females

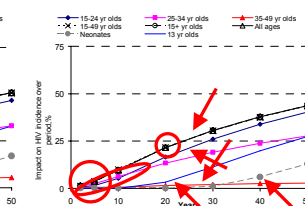

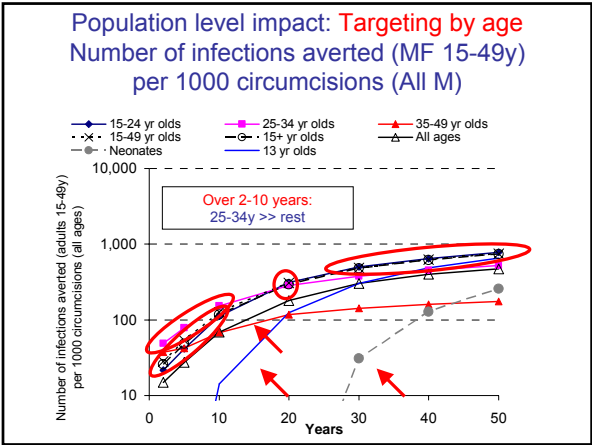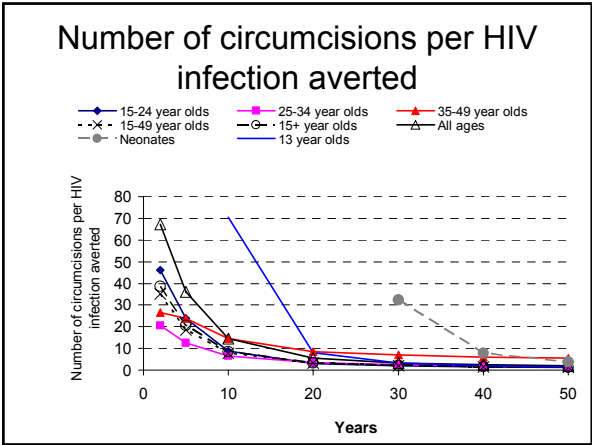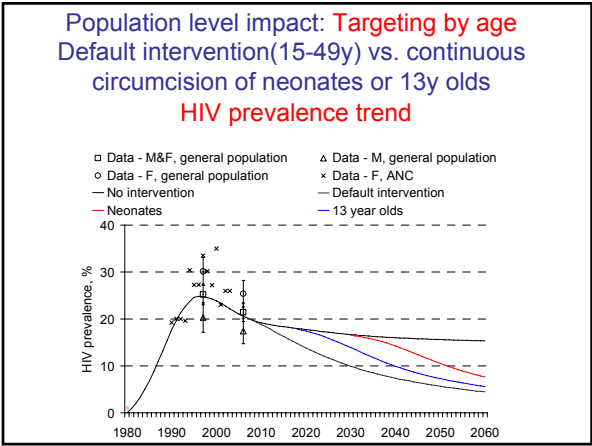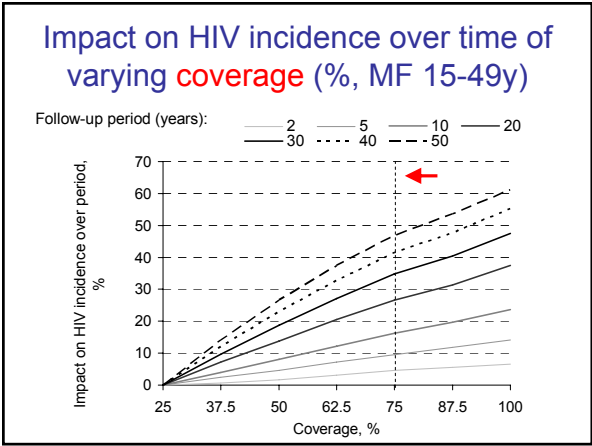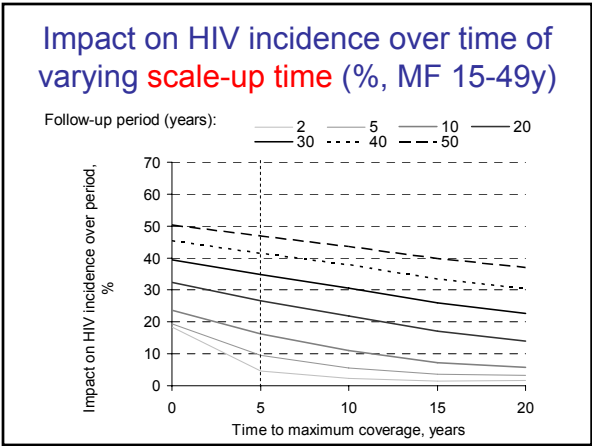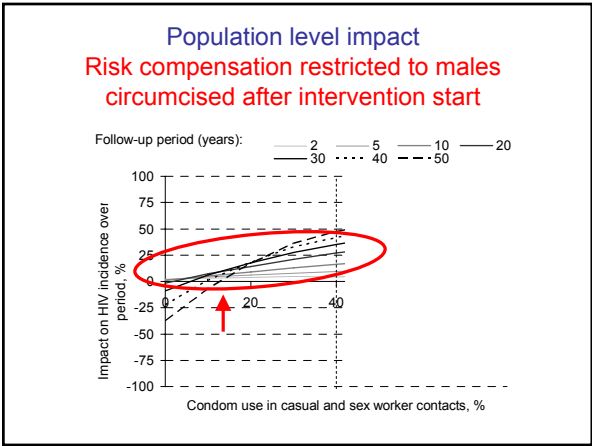

### Population level impact Risk compensation in **all** circumcised males

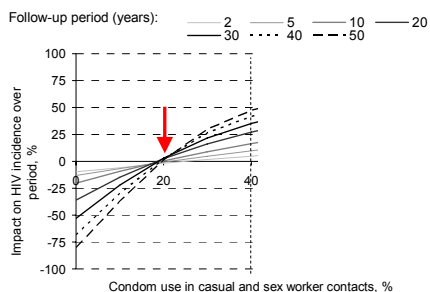

### Population level impact in **males** of circumcising **HIV infected** males (15-49y)

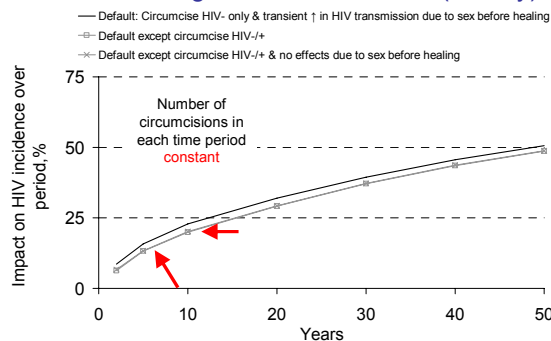

### Population level impact in **females** of circumcising **HIV infected** males (15-49y)

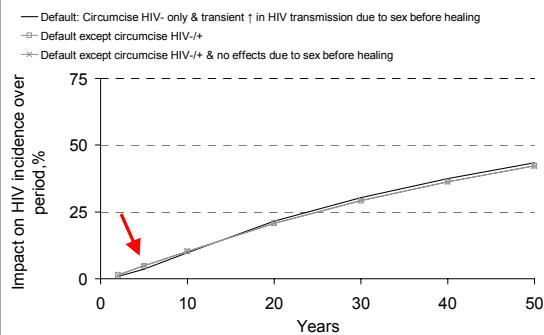

### Population level impact in **males** of assuming circumcision **halves** the per-contact **male-to-female** HIV transmission probability

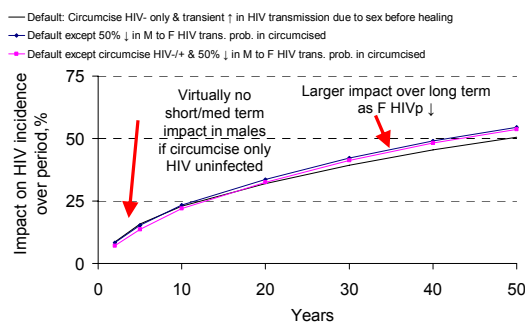

### Population level impact in **females** of assuming circumcision **halves** the per-contact **male-to-female** HIV transmission probability

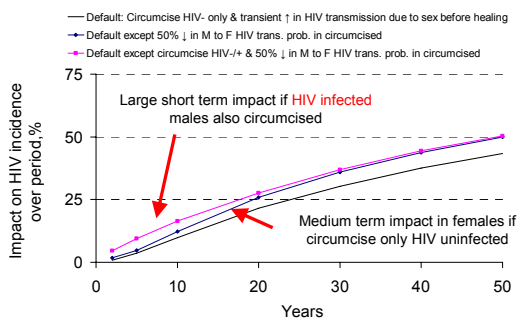

## Limitations

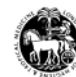

- May have **over**estimated impact
  - Have assumed impact of MC on ulcers
- May have **under**estimated impact
  - Over longer term because of increasing risk in effective intervention scenarios
- Plausible ranges not shown
- Sensitivity analysis
  - Effect of alternative assumptions of MC on STIs
  - Other key parameter values
- Other scenarios and settings
  - Lower/higher risk behaviours/ STI/ HIV rates



### Summary and policy implications

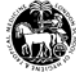

- Short term impact in **women** will be **small unless** strong direct impact on M>F transmission *and* circumcision of HIV+s
- Difference M vs F will reduce over time
- Over first 10 years, targeting 25-34 year olds may be more effective per-circumcision than targeting younger males  
=> Change recommended priority age group to 15-34?
- Will wait **20-40 years** to get population level impact via **neonates**

### Summary and policy implications

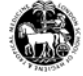

- To maximise the number of infections averted, scale-up quickly with high coverage, while maintaining quality(!)
- **Risk compensation**
  - If limited to newly circumcised, it will reduce impact over medium term & potential to negate impact over long term
  - Effect is strongly dependent on whether already-circumcised change behaviour  
=> target IEC at already-circumcised?

### Summary and policy implications

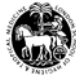

- Circumcising HIV+ males
  - Will reduce population level impact in **males** in short term *if* coverage of HIV-uninfected males not maintained
  - Population level impact in **females**
    - **may be small** *if* only small proportion of men resume sex before wound healing and circumcision lowers STI rates
    - **or may increase markedly** *if* direct impact on M>F HIV trans. prob.

### Acknowledgements

#### *London School of Hygiene and Tropical Medicine*

Judith Glynn, Helen Weiss, Kate Orroth, Esther Freeman, Richard Hayes

#### *Institute of Tropical Medicine, Antwerp*

Anne Buvé

#### *Erasmus Medical Center, Rotterdam*

Roel Bakker

#### *UCSF, US*

Craig Cohen

#### *Members of the Study Group on Heterogeneity of HIV Epidemics in African Cities*

#### *Funding*

Wellcome Trust

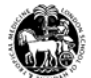

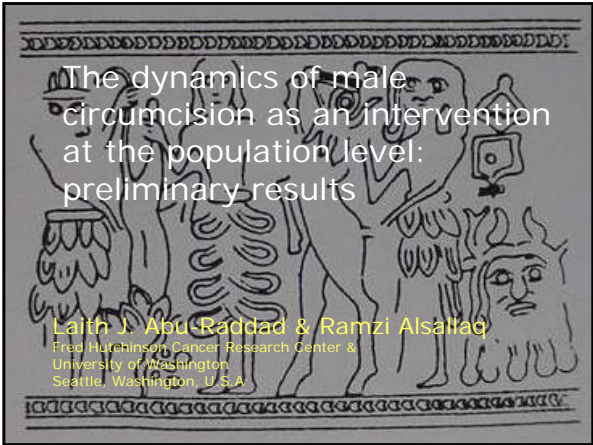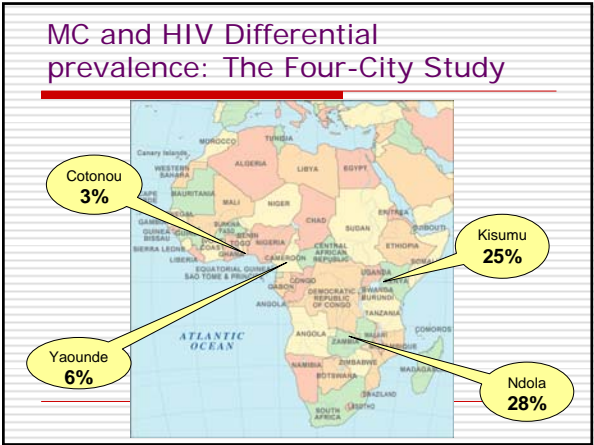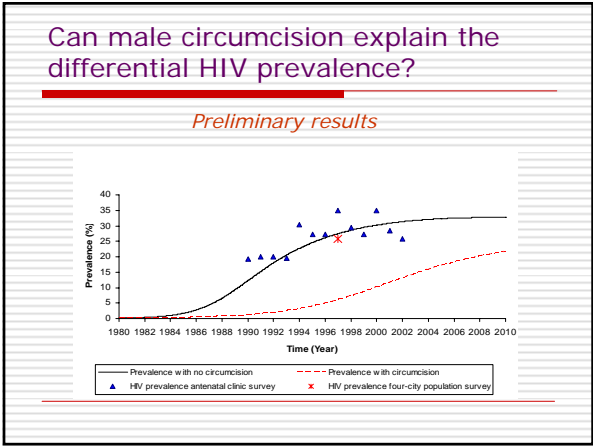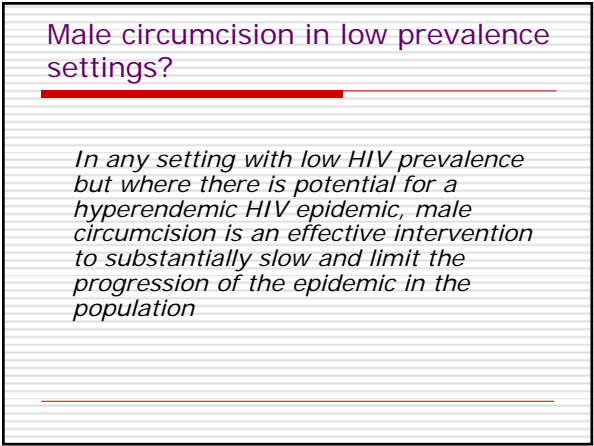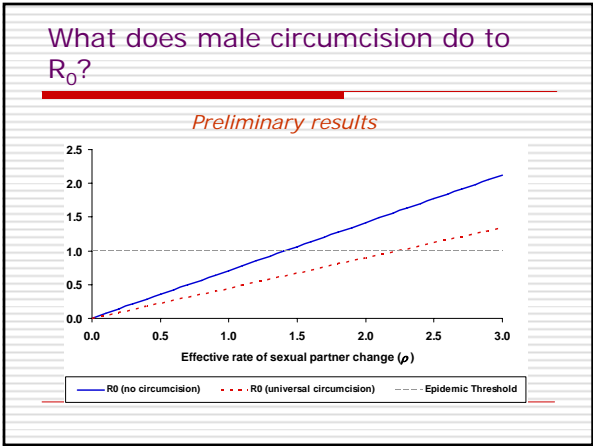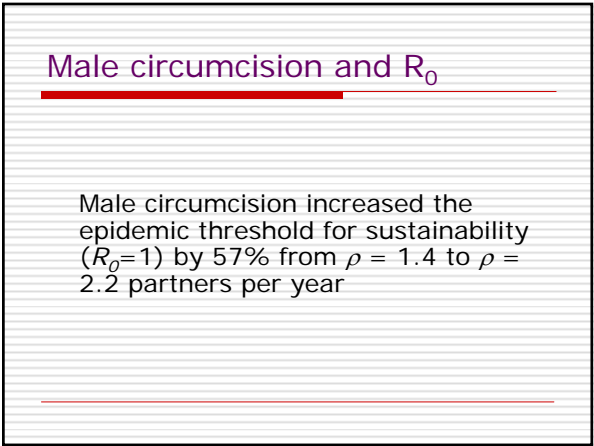

HIV epidemiology in a setting with low coverage of male circumcision

*Preliminary results*

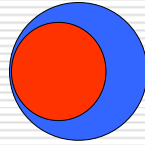

HIV infectious spread is sustainable in the majority of the population

Male circumcision: a “quarantine” measure for HIV infection

*Preliminary results*

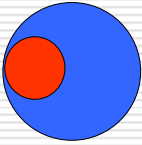

HIV infectious spread is sustainable only in a minority of the population where sexual risk behavior level is high

Epidemiologic evidence from Western Africa

*Among the male population of Accra aged 15-59 years, 84% of prevalent cases of HIV were attributable to transactional sex (Cote et al 2004)*

*Unprotected sex with male clients of female sex workers in Cotonou could account for most if not all of the estimated yearly numbers of HIV infections in Cotonou women (Lowndes et al 2002)*

A sexist intervention benefiting only males?

*Preliminary results*

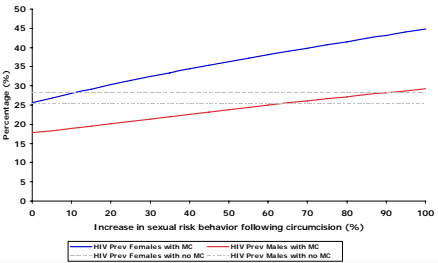

Sensitivity to two assumptions of how risk behavior could increase

Balance of partnerships:

- Increase in risk behavior among men imply increased risk among women
- Differential disease morbidity and mortality of women versus men could create demographic imbalance (HAART could limit this aspect)

MC uptake: Relative decline in incidence rate up to 2020 with slow roll-out

*Preliminary results*

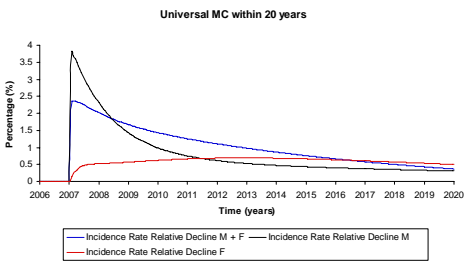

MC uptake: Relative decline in incidence rate up to 2020 with rapid roll-out

Preliminary results

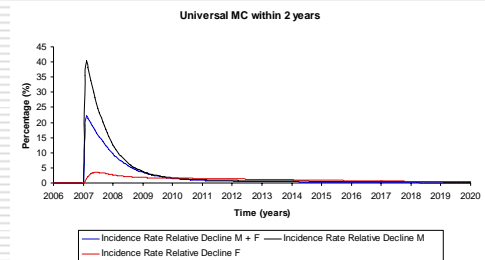

MC uptake: HIV prevalence in 2020 with universal MC but at different rates

Preliminary results

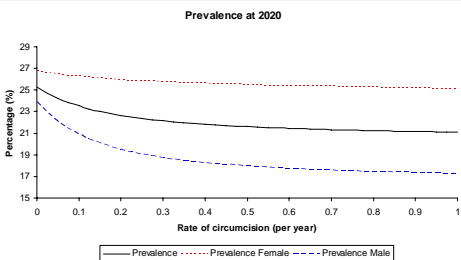

MC uptake: number of MCs per infection averted up to 2020

Preliminary results

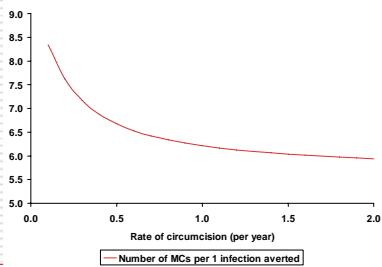

Parameterization of the risk of exposure to HIV in the population

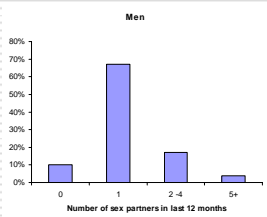

Update of findings from the  
Rakai trials

Ron Gray

HIV and HSV-2 acquisition in  
HIV-negative men

Male HIV incidence with completed  
follow up over 24 months

- The trial was stopped when only 44% of participants could complete the 2<sup>nd</sup> year follow up
- Updated 2<sup>nd</sup> year incidence for completed follow up (Nov 2007)

Male HIV Incidence by follow up interval and  
cumulatively 0-24 months (Nov 2007)

| FU Interval | Intervention |             | Control |             | IRR (CI)          |
|-------------|--------------|-------------|---------|-------------|-------------------|
|             | Inc/py       | Inc/ 100 py | Inc/py  | Inc/ 100 py |                   |
| 0-6         | 14/1172      | 1.2         | 19/1207 | 1.6         | 0.76<br>(0.4-1.6) |
| 6-12        | 5/1191       | 0.4         | 14/1176 | 1.2         | 0.35<br>(0.1-1.0) |
| 12-24       | 6/2133       | 0.3         | 26/2165 | 1.2         | 0.23<br>(0.1-0.6) |
| 0-24        | 25/4569      | 0.6         | 59/4629 | 1.3         | 0.43<br>(0.3-0.7) |

HSV-2 acquisition

- 5534 HIV-neg men screened for enrollment HSV-2 using Kalon IgG HSV-2 ELISA
- 3393 (61.3%) HSV-2 negative (index value <0.9)
- 1684 Intervention, 1709 Controls
- HSV-2 acquisition defined as an index value >1.5 during follow up

HSV-2 Incidence by Study Group and  
Follow-up Interval

|                                        | Intervention group | Control group | Incidence rate ratio (95% CI) | p value |
|----------------------------------------|--------------------|---------------|-------------------------------|---------|
| <b>0-6 months follow-up interval</b>   |                    |               |                               |         |
| Number of participants                 | 1576               | 1608          |                               |         |
| Incident events                        | 26                 | 39            |                               |         |
| Person-years                           | 781.5              | 794.5         |                               |         |
| Incidence per 100 person-years         | 3.33               | 4.91          | 0.68 (0.40-1.14)              | 0.1242  |
| <b>6-12 months follow-up interval</b>  |                    |               |                               |         |
| Number of participants                 | 1550               | 1570          |                               |         |
| Incident events                        | 32                 | 45            |                               |         |
| Person-years                           | 744.75             | 741.5         |                               |         |
| Incidence per 100 person-years         | 4.3                | 6.07          | 0.71 (.44-1.14)               | 0.1355  |
| <b>12-24 months follow-up interval</b> |                    |               |                               |         |
| Number of participants                 | 1314               | 1330          |                               |         |
| Incident events                        | 58                 | 75            |                               |         |
| Person-years                           | 1279.25            | 1278.25       |                               |         |
| Incidence per 100 person-years         | 4.53               | 5.87          | 0.77 (0.54-1.10)              | 0.1404  |
| <b>Total 0-24 months follow-up</b>     |                    |               |                               |         |
| Number of participants                 | 1576               | 1608          |                               |         |
| Incident events                        | 116                | 159           |                               |         |
| Person-years                           | 2805.5             | 2814.25       |                               |         |
| Incidence per 100 person-years         | 4.13               | 5.65          | 0.73 (0.57-0.93)              | 0.0103  |

### Kaplan-Meier Cumulative Probabilities of HSV-2 acquisition

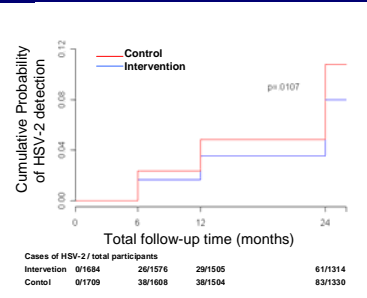

Cox HR estimate = .733 (.489, .977)

### HIV acquisition by HSV-2 Infection Status and Study Arm

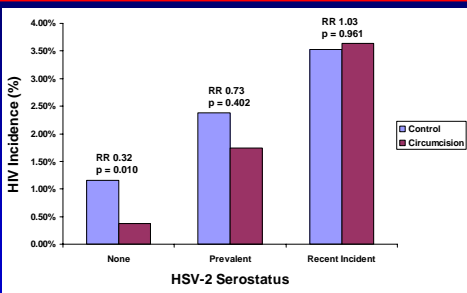

- The indeterminant baseline samples (index values 0.9-1.5) were counted as initially negative.

### Structure of Two Rakai MC Trials

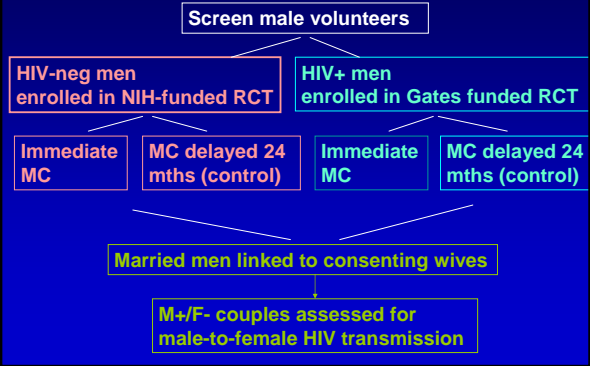

### Surgical adverse events (AEs), wound healing and resumption of sex

- AEs in HIV+ and HIV-neg men
- Wound healing in HIV+ and HIV-neg
- Sex before healing and AEs

### Surgery-related adverse events in circumcised HIV+ men compared to HIV-neg men

|          | HIV+ men<br>% (N)             | HIV-neg men<br>% (N)           |
|----------|-------------------------------|--------------------------------|
| Mild     | 2.9 (12)                      | 4.0 (94)                       |
| Moderate | 3.1 (13)                      | 3.1 (73)                       |
| Severe   | 0 (0)                         | 0.2 (5)                        |
| Total    | 6.0 (25)                      | 7.4 (172)                      |
|          | Total # of surgeries<br>= 420 | Total # of surgeries<br>= 2326 |

### Completed wound healing by postoperative time

|         | HIV +        |      | HIV-neg       |        |
|---------|--------------|------|---------------|--------|
|         | Healed/<br>N | %    | Healed/<br>N  | %      |
| 30 days | 287/ 393     | 73.0 | 1879/<br>2258 | 83.2*  |
| 6 weeks | 364/393      | 92.7 | 2163/<br>2258 | 95.8** |

\*P < 0.001, \*\*P = 0.006

Postoperative healing is slower in HIV+.  
Most men healed by 6 weeks

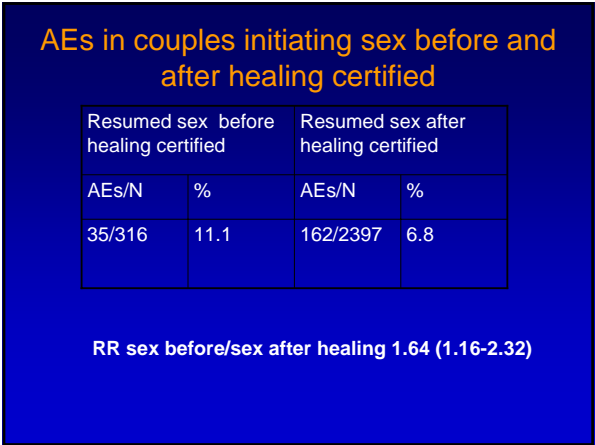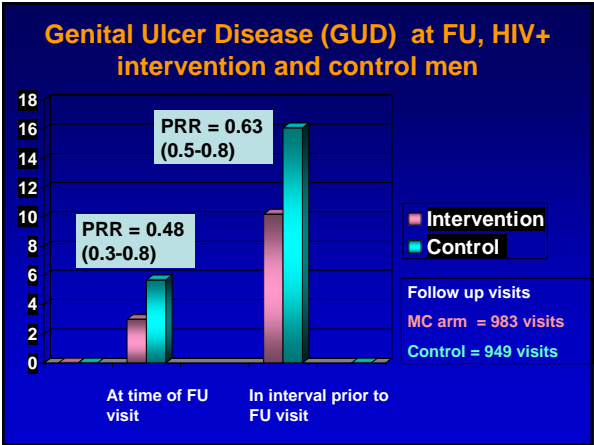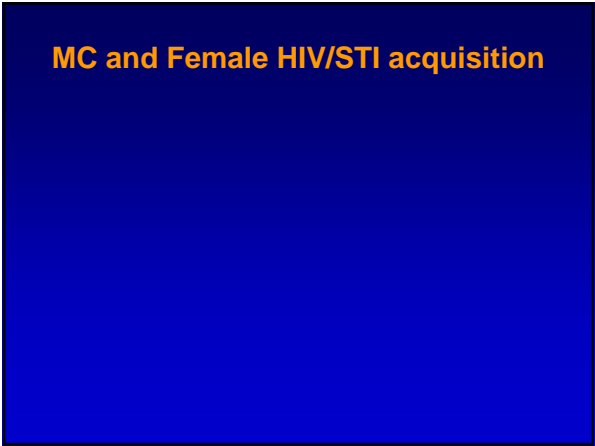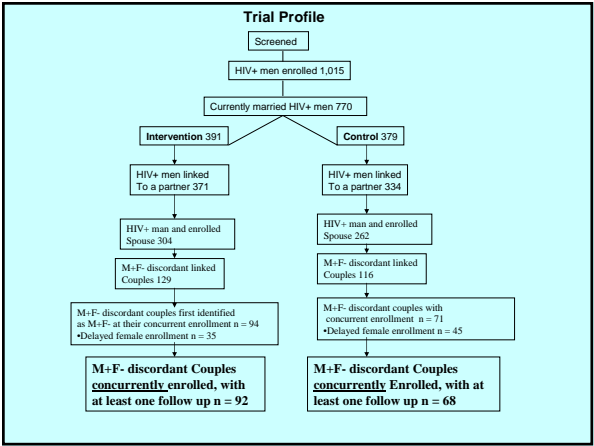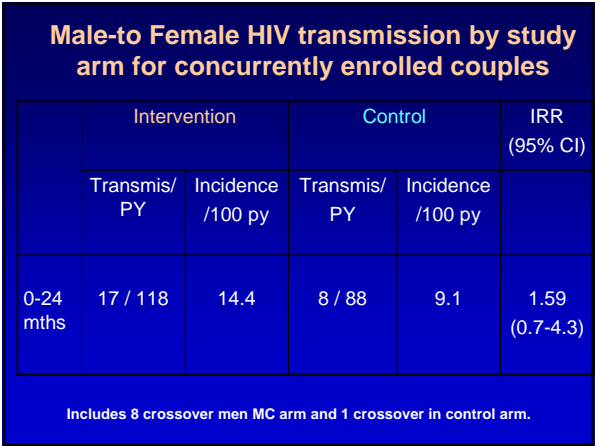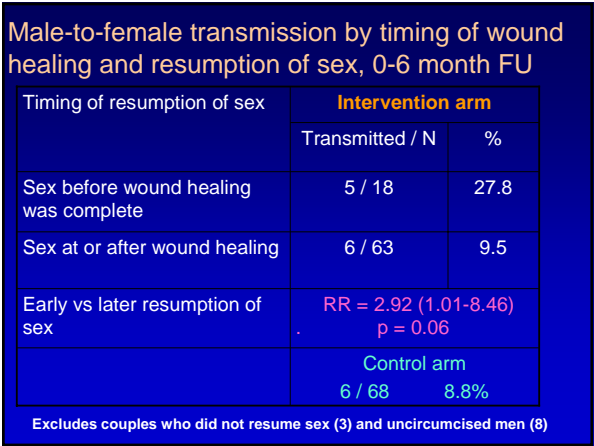

## BV, Trichomonas and GUD in HIV-neg female partners

- Identified HIV-negative women married to HIV-neg male trial participants with both partners enrolled at the same time
- Women followed at one year to detect:
  - Self-reported vaginal symptoms
  - Trichomonas by culture
  - BV by Gram stain (Nugent's score)

## Male Circumcision for Prevention of Vaginal Infections in Female HIV-negative Partners Trial Design

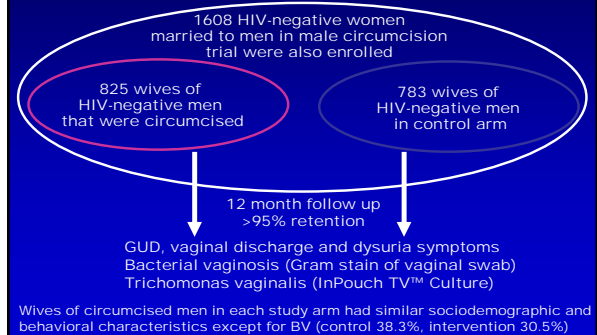

## Vaginal symptoms at 12 months follow up by husband's study arm

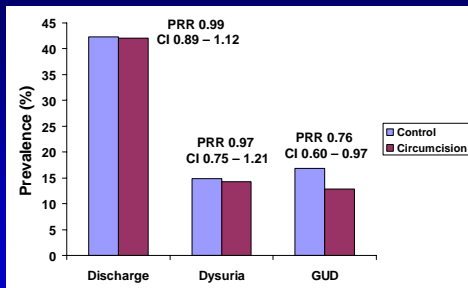

- Significant reduction of GUD in wives of circumcised men ( $p = 0.03$ ). No effect on discharge or dysuria.

## Vaginal infections at 12 month follow up by husband's study arm

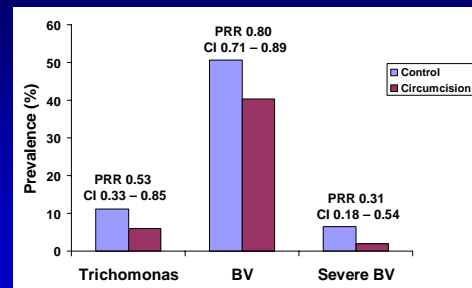

## BV at Follow up by BV at Enrollment and Study Arm

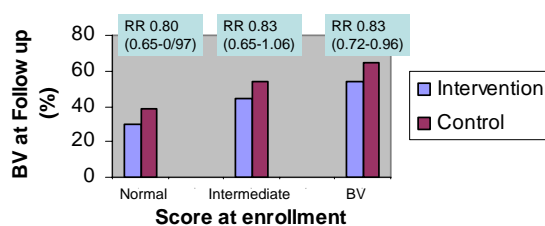

Reduced progression to BV and reduced persistence in women with initial BV

## Summary

- HIV-neg men. Completed fu confirms long-term protection from HIV
- MC reduces HSV-2 acquisition in men
- Surgery as safe in HIV+ as in HIV-neg, but healing is slower in HIV+.
- AEs increased with early resumption of sex before wound healing. Recommend abstinence for 6 weeks postop?
- Reduced GUD in HIV+ men a direct benefit of MC
- No reduction of Male to female HIV transmission, possible increased risks with intercourse before completed wound healing
- MC reduces GUD, Tv and BV in female partners



# CIRCUMCISION IN ZIMBABWE: THE INFLUENCE OF EPIDEMIOLOGICAL CONTEXT AND QUANTIFYING UNCERTAINTY IN PROJECTIONS

TB Hallett\*, J Griffin, J Smith, KJ Singh, RG White, LJ Abu-Raddad,  
A Ghani, S Gregson, GP Garnett  
Imperial College London  
Bill & Melinda Gates Foundation  
London School of Hygiene and Tropical Medicine  
University of Washington  
\*timothy.hallett@imperial.ac.uk

## Contents

Develop understanding of the problem

- Qualitative insights:
  - Relative benefit among men and women
  - Interactions with other interventions
  - Best age to circumcise
  - Impact of risk compensation and increased rates of transmission
- Quantitative insights – for an intervention in Zimbabwe:
  - Uncertainty in projections due to uncertain epidemiological context; conditions conducive to a successful intervention.
  - Grand uncertainty in key indicators due to context and nature of intervention
  - Key determinants of intervention impact.

Provide reliable description of problem and make projections

## Methods

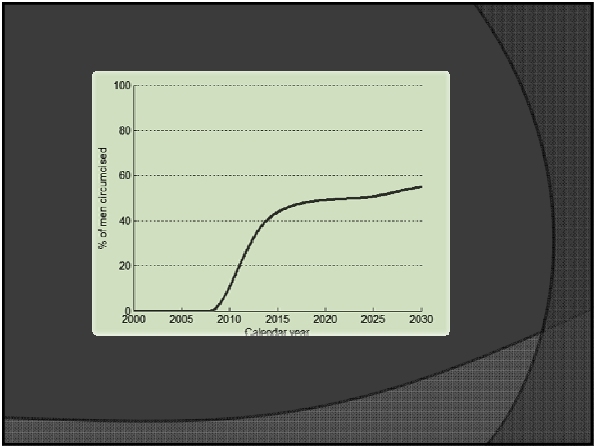

### Qualitative insights:

- Relative benefit among men and women
- Interactions with other interventions
- Best age to circumcise
- Impact of risk compensation and increased rates of transmission

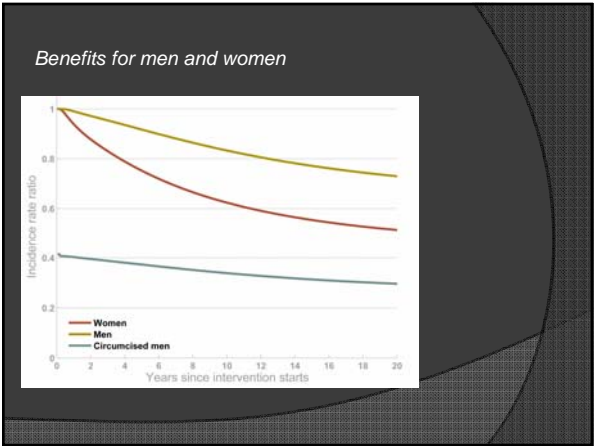

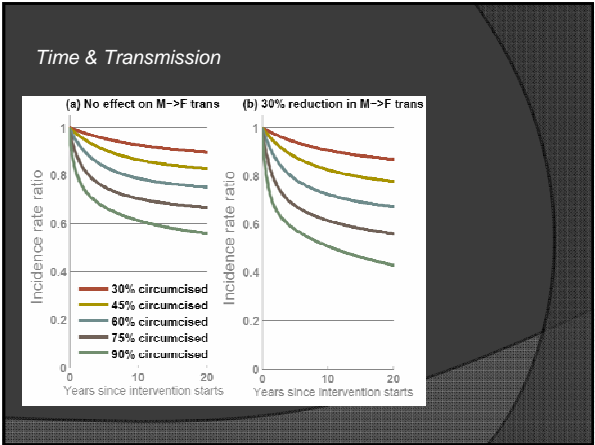

**Qualitative insights:**

- Relative benefit among men and women
- Interactions with other interventions
- Best age to circumcise
- Impact of risk compensation and increased rates of transmission

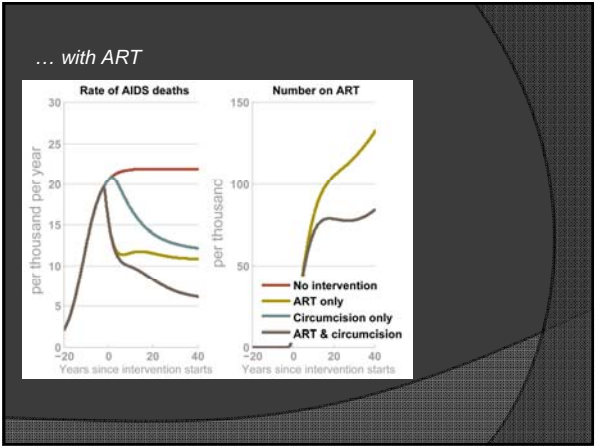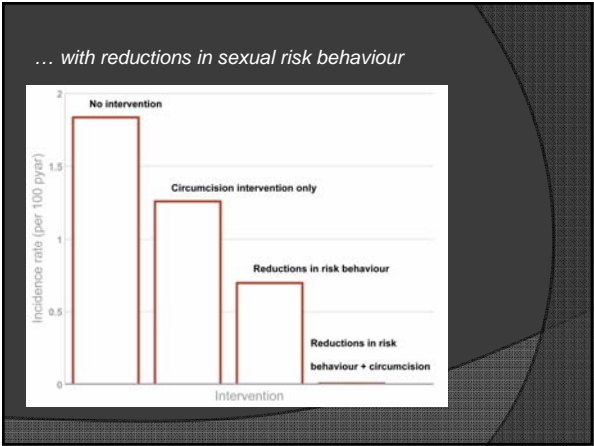

[Synergistic operation]

**Qualitative insights:**

- Relative benefit among men and women
- Interactions with other interventions
- Best age to circumcise
- Impact of risk compensation and increased rates of transmission

[From CDC report]

**Qualitative insights:**

- Relative benefit among men and women
- Interactions with other interventions
- Best age to circumcise
- Impact of risk compensation and increased rates of transmission

*Risk compensation = less condom use with casual partners*

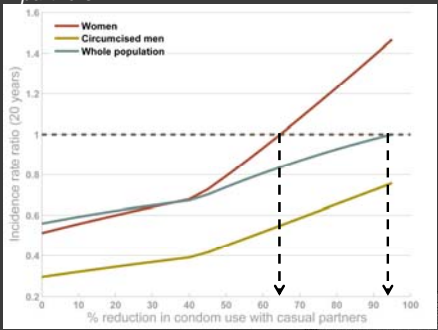

*[parameter space plot]*

*Increased risk of transmission (x3) during wound healing.*

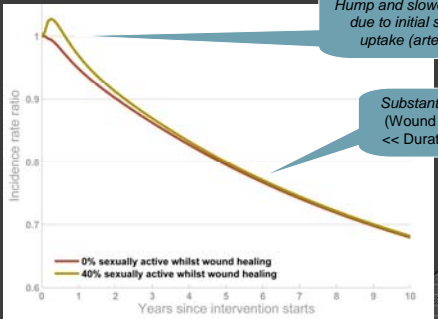

**The Testing Issue:**

**HIV-testing before circumcision:**

- Avoids circumcising HIV+ men;
- Avoids putting some individual women at increased risk
- But... may reduce uptake, particularly among high-risk men
- (And the impact of the intervention is greater if high-risk men circumcised).

- |                                      |                                                |
|--------------------------------------|------------------------------------------------|
| <b>Individual-level perspective:</b> | Do not circumcise HIV+ men (test all);         |
| <b>Population-level perspective:</b> | Circumcise all men, even if HIV+ (no testing); |

Quantitative insights – for an intervention in Zimbabwe:

Uncertainty in projections due to uncertain epidemiological context; conditions conducive to a successful intervention.

Grand uncertainty due to context and nature of intervention  
Key determinants of intervention impact.

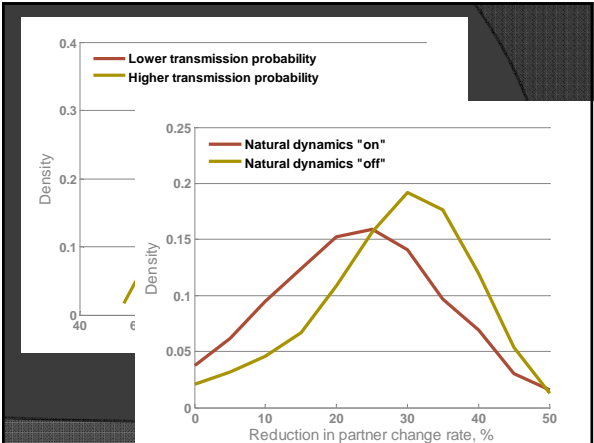

Apply same circumcision intervention to alternative 'epidemiological contexts'

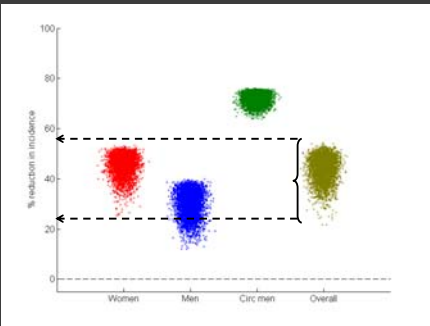

| Parameter                                                       | SRCC  | 95% Confidence Interval | % Variation explained |
|-----------------------------------------------------------------|-------|-------------------------|-----------------------|
| <b>Urban</b>                                                    |       |                         |                       |
| Relative change in condom use with non-regular partners         | 0.35  | 0.34 - 0.36             | 12%                   |
| Risk ratio in medium-risk group (females)                       | -0.30 | -0.32 - -0.29           | 9%                    |
| Risk ratio in medium-risk group (males)                         | -0.25 | -0.26 - -0.23           | 6%                    |
| Relative change in rate of partner change rate                  | -0.22 | -0.24 - -0.21           | 5%                    |
| R-squared (full model):                                         |       |                         | 84%                   |
| <b>Rural</b>                                                    |       |                         |                       |
| Fraction of high-risk females in highest risk group             | -0.34 | -0.37 - -0.31           | 11%                   |
| Relative change in condom use with non-regular partners         | 0.33  | 0.31 - 0.35             | 11%                   |
| Fraction of females in higher-risk groups                       | -0.31 | -0.34 - -0.27           | 9%                    |
| Fraction of high-risk males in highest risk group               | -0.26 | -0.29 - -0.24           | 7%                    |
| Relative change in rate of partner change rate                  | -0.23 | -0.25 - -0.21           | 5%                    |
| Fraction of non-regular partnerships with consistent condom use | 0.23  | 0.21 - 0.24             | 5%                    |
| Mean partner change rate (males)                                | 0.22  | 0.19 - 0.24             | 5%                    |
| Number of sex acts in a non-regular partnership per year        | -0.21 | -0.24 - -0.19           | 5%                    |
| R-squared (full model):                                         |       |                         | 62%                   |

What conditions are conducive to circumcision interventions?

- “Distributed risk”
  - High prevalence mediated by many people having moderate risk, cf. few people having very high risk. [Effect of circumcision among highly-exposed men is nothing!]
- High condom use in casual partnerships / casual partnerships short.
  - Circumcision works best when condom use is higher in the partnerships likely to lead to HIV-exposure.
- Recent reductions in risk behaviour
  - Independent behavioural changes have weakened chains of transmission generally.

Quantitative insights – for an intervention in Zimbabwe:

Uncertainty in projections due to uncertain epidemiological context; conditions conducive to a successful intervention.

Grand uncertainty due to context and nature of intervention  
Key determinants of intervention impact.

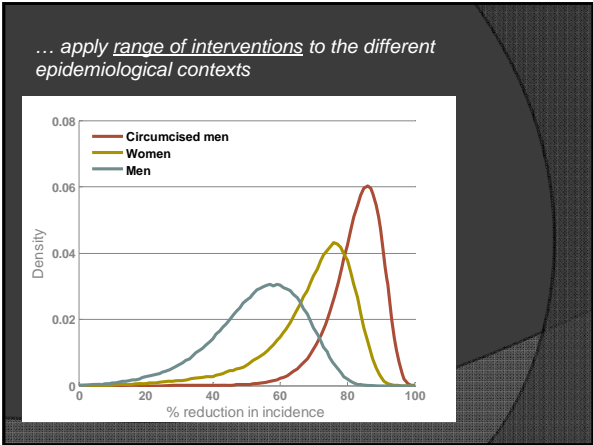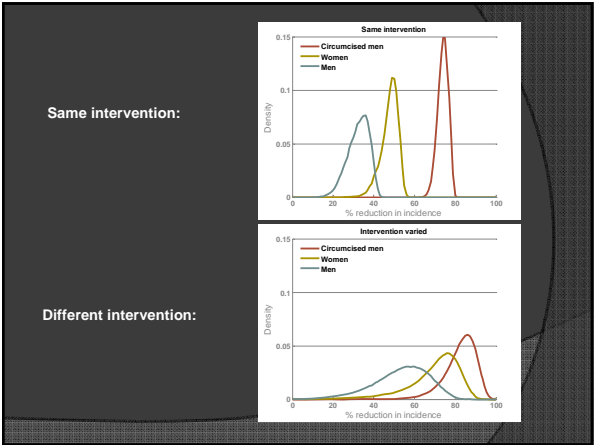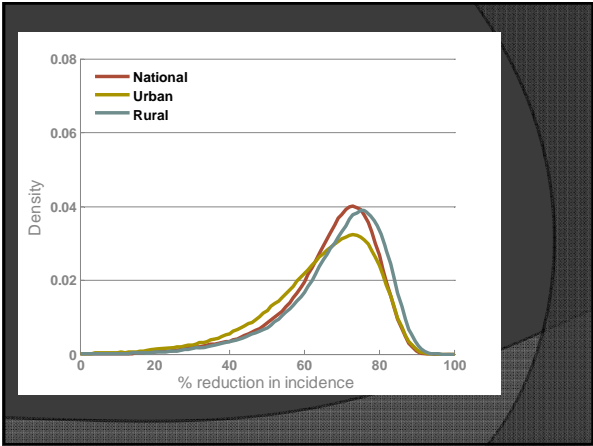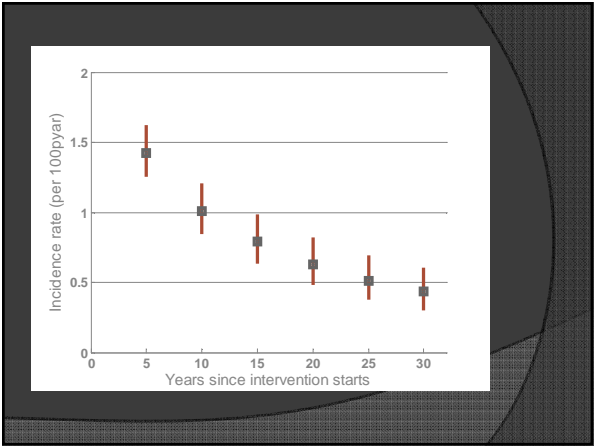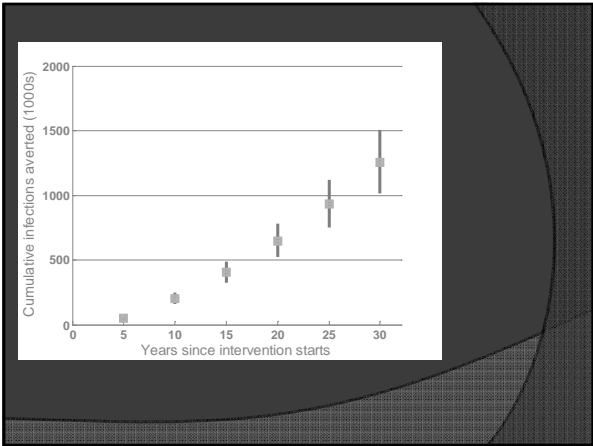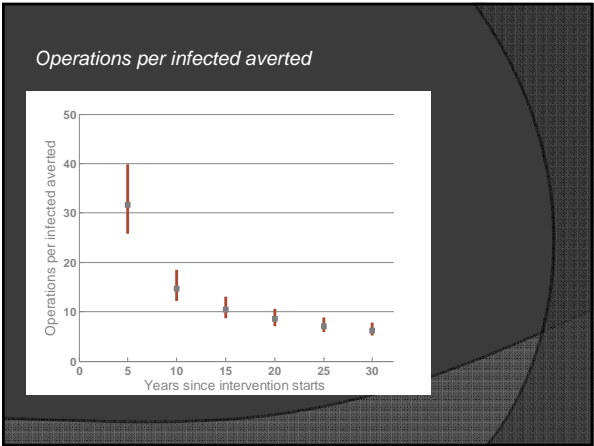



**Quantitative insights – for an intervention in Zimbabwe:**

Uncertainty in projections due to uncertain epidemiological context; conditions conducive to a successful intervention.

Grand uncertainty due to context and nature of intervention

Key determinants of intervention impact.

|                 | Intervention parameter            | Coefficient | % Variation explained | R-squared of full model |
|-----------------|-----------------------------------|-------------|-----------------------|-------------------------|
| 5 years:        |                                   |             |                       |                         |
| Overall         | Relative risk of HIV transmission | -0.847      | 72%                   | 86%                     |
|                 | HIV+ get circumcised              | 0.352       | 12%                   |                         |
| Circumcised men | Relative risk of HIV acquisition  | -0.910      | 83%                   | 96%                     |
|                 | Increase in partner change rate   | -0.260      | 7%                    |                         |
| Women           | Relative risk of HIV transmission | -0.871      | 76%                   | 91%                     |
|                 | HIV+ get circumcised              | 0.376       | 14%                   |                         |
| Men             | Relative risk of HIV transmission | -0.770      | 59%                   | 87%                     |
|                 | HIV+ get circumcised              | 0.352       | 12%                   |                         |
|                 | Increase in partner change rate   | 0.343       | 12%                   |                         |
| 30 Years:       |                                   |             |                       |                         |
| Overall         | Relative risk of HIV transmission | -0.824      | 68%                   | 75%                     |
|                 |                                   |             |                       |                         |
| Circumcised men | Relative risk of HIV acquisition  | -0.597      | 36%                   | 74%                     |
|                 | Relative risk of HIV transmission | -0.564      | 32%                   |                         |
| Women           | Relative risk of HIV transmission | -0.862      | 74%                   | 81%                     |
| Men             | Relative risk of HIV transmission | -0.747      | 56%                   | 64%                     |

*Key determinants of intervention impact:*

- Short-term
  - Circumcised men: Reduction in acquisition
  - Everyone else: Reduce in transmission
- Long-term
  - Circumcised men: Reduction in acquisition; Reduction in transmission
  - Everyone else: Reduction in transmission
- Association with other parameters exists but it swamped by association between these two key parameters:
  - (Even risk compensation/ transmission during would healing).
  - (Even parameters describing epidemiological context – these add to scatter though)

*Overall conclusions*

- Possible to draw broad conclusions on how interventions operate in wide-range if circumstances.
- Model make very useful insights – and the emerging consensus is especially important (more in a minute).
- Uncertainty in quantitative predictions is great and permanent:
  - No more RCTs on transmission?;
  - No vast increase in availability of sex-partner network data on national scale planned?
- Therefore, crucial to fairly represent this in any statement, model, overall finding, etc.

*Structural Uncertainty & Model Comparisons*

- All conclusions based on accepting that model structure is true.  
(Even the uncertainty analyses, which carefully accounts for errors in data, fully accepts model structure).
- To what extent are the conclusions dependent on the structural assumptions?

**Example of issues where structure might interfere with conclusions:**

*Partnership Duration:*  
Some model do not explicitly track duration of partnerships -- all partnerships instantaneous but many partnerships are actually long-term.  
Since protective benefit depends on exposure, (men in long-term partnerships get proportionately less benefit if exposed), do we over-estimate benefit of circumcision?  
→ Depends on complex structure of network, because we also under-estimate benefit of circumcision for men in very short-term partnerships & how frequently are faithful men held in partnerships with infected women?

*Best Age to Circumcise:*  
This will depend on pattern of mixing by age – older men disproportionate influence on HIV transmission to young women.... stronger indirect effect by circumcising men at older age?  
Pattern of condom use varies by age... young men tend to use condoms more.... Stronger direct effect from circumcising men at younger age?

### *Structural Uncertainty & Model Comparisons*

- *The published models of the impact of circumcision span the range of complexity, although no model does everything.*
- *With complexity comes greater 'accuracy', but at the cost of transparency and power to interrogate.*
  
- *So – we have an opportunity to meet the **gold-standard**:*
  - *Many models have set been used to address the same questions*
  - *Models are in good agreement, generally.*
  - *We need to identify where they differ and understand why.*
  - *And then we have a powerful and robust consensus.*
  - *And we can be confident that our structural assumptions do not interfere.*

## Male circumcision for HIV prevention: who, what, when?

UNAIDS/ WHO/  
SACEMA  
Consultation

London, March,  
2008

Richard White  
and colleagues

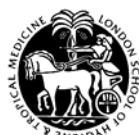

## Aim and objectives

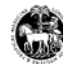

- Explore the population level impact of various scenarios of the rollout of MC in an urban population in East Africa
  - Estimate the **population level impact** of a linear increase in the proportion of circumcised **HIV-uninfected males** in the targeted age groups
    - from 25% (pre-intervention prevalence) to 75% over 5 years,
    - with no risk compensation
  - Estimate magnitude of **risk compensation** required to negate impact of the plausible MC intervention, and the potential of increased condom use (due to counselling) to increase impact
  - Estimate population level impact of **inadvertently circumcising HIV infected males**
  - Estimate cost per HIV infection averted

## Methods and assumptions (1)

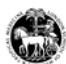

- **Individual-level stochastic model STDSIM**
  - simulates the spread of HIV and STIs
  - dynamic sexual network of simulated individuals and their sexual contacts
  - Present average of 500 iterations per scenario
- **Baseline scenario**
  - Fitted to the demographic, behavioural and epidemiological characteristics of the urban population (Kisumu) in East Africa in 1997 and 2006, and the impact of MC measured in young men in the Kisumu RCT (59%, 95% CI=30-76)
  - 25% of males already circumcised

## Circumcision assumptions

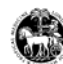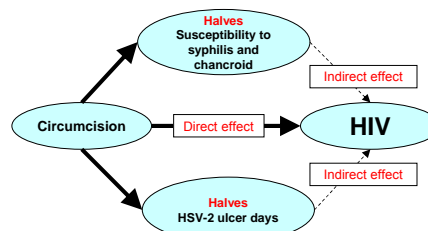

- HIV- M:** ► reduced susceptibility to HIV acquisition (fitted to RCT)  
 ► double the risk of acquisition from HIV+ F over 6m in 15% M who resume sex before healing
- HIV+ M:** ► double risk of transmission to F over 6m, in 15% of men who resume sex before healing (only direct effect on M to F)

## Methods and assumptions (2)

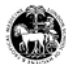

- **Intervention scenarios**
  - Intervention starts 1<sup>st</sup> January 2007
- **Default scenario**
  - Linear increase in proportion of HIV **uninfected** males in targeted age group from 25% to 75% over 5 years
  - no risk compensation
  - Target age groups: 15-24y, 25-39y, 39-34y, 35-49y, 15-49y, neonates and 15 year olds
- **Primary Outcomes**
  - Impact on HIV incidence (%):  

$$= (1 - \text{mean IRR among MF 15-49 years old}) \times 100$$
  - Number of circumcisions per HIV-infection averted (MF 15-49y)
  - Over 2,5,10,20,30,40 and 50 years
- **Plausible range**
  - Based on 95% confidence estimates from the Kenyan circumcision trial

## Methods and assumptions (3)

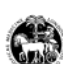

- Estimate cost per HIV infection averted
  - Assume cost of circumcision
    - Adults : \$51 (33-69)
    - Neonates : \$15 (7-25)
  - Future costs and effects were discounted at 3% per year, and cost-effectiveness is presented in present value
  - Compared to a recent estimate of the present value of lifetime treatment costs of an HIV infection in Africa (\$3,469 in 2004US\$), recalculated using a 3% discount rate and adjusted for inflation to 2007US\$ (\$4,043)



## Methods and assumptions (3)

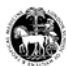

- Alternative scenarios
  - Behaviour change
    - In default scenario condoms are used in 40% of casual and sex-contacts after 2000, with 10% failure
    - Vary condom use between 0-30% (risk compensation) and 50-80% (effective safe-sex counselling) in
      - Recently circumcised men
      - All circumcised men (including 25% already circumcised)
  - Direct effect on M to F HIV transmission probability
    - Assume 50% reduction

## Methods and assumptions (4)

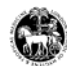

- Alternative scenarios continued
  - Effect of circumcising HIV infected males
    - Circumcise 15-49 year old males regardless of HIV status
      - With and without assuming circumcising males halves the male-to-female transmission probability of HIV
    - Keep number of circumcisions over each time period equal to that modelled in default scenario

## Results: Baseline scenario

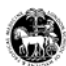

### Population structure by age and sex

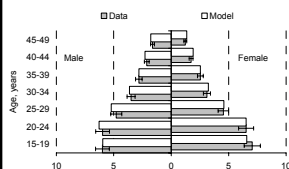

### Prevalence of steady partnerships

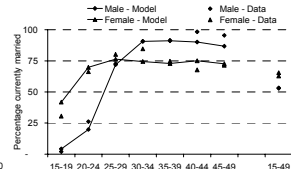

## Results: Baseline scenario

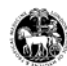

### STI prevalence

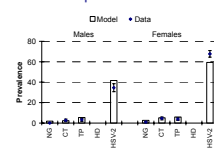

### HIV prevalence trend

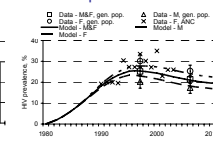

### HIV prevalence by age - Males

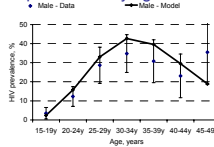

### HIV prevalence by age - Females

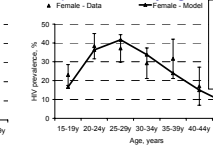

Age difference in casual and steady partnerships:  
Data: 5 years  
Model: 6.6 years

## 1) What is the overall impact on men?

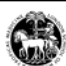

Proportional reduction in incidence and number of circumcisions per HIV infection averted in men over 10 year or 20 years  
Targeting 15-24 year old males

|                                                | Over 10 years | Over 20 years |
|------------------------------------------------|---------------|---------------|
| HIV incidence reduction, % (15-49y)            | 14 (7-20)     | 25 (13-34)    |
| Number of circ. per infection averted (15-49y) | 13 (9-28)     | 6 (4-11)      |

## 2) What is the overall impact on women?

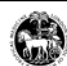

Proportional reduction in incidence women and number of circumcisions per HIV infection averted in women over 10 year or 20 years  
Targeting 15-24 year old males

|                                                | Over 10 years | Over 20 years |
|------------------------------------------------|---------------|---------------|
| HIV incidence reduction, % (15-49y)            | 5 (3-7)       | 17 (10-22)    |
| Number of circ. per infection averted (15-49y) | 30 (25-53)    | 8 (6-13)      |

### 3) How do the effects vary by the age group circumcised?

Ratio of total impact (Number of circ. per HIV inf. averted in MF over 5, 10, 20 & 30 years) for each target age group  
relative to targeting 15-24 year olds

|          | 5   | 10  | 20  | 30  | 5          | 10         | 20       | 30         |
|----------|-----|-----|-----|-----|------------|------------|----------|------------|
| 15-24    | 1.0 | 1.0 | 1.0 | 1.0 | 24 (18-60) | 9 (6-18)   | 3 (2-6)  | 2 (2-3)    |
| 25-29    | 1.8 | 1.3 | 0.9 | 0.7 | 13 (8-20)  | 7 (5-12)   | 4 (3-6)  | 3 (2-5)    |
| 30-34    | 1.8 | 1.2 | 0.7 | 0.6 | 13 (9-25)  | 8 (5-16)   | 4 (3-9)  | 4 (3-7)    |
| 35-49    | 1.0 | 0.6 | 0.4 | 0.3 | 24 (18-49) | 15 (9-42)  | 9 (6-19) | 7 (5-14)   |
| 15-49    | 1.3 | 1.1 | 1.0 | 1.0 | 19 (13-38) | 8 (6-15)   | 3 (2-6)  | 2 (2-4)    |
| Neonates |     |     |     | 0.1 |            |            |          | 33 (23-75) |
| 15y olds |     | 0.2 | 0.6 | 0.7 |            | 47 (17-74) | 6 (4-10) | 3 (2-5)    |

### 3) How do the effects vary by the age group circumcised?

Ratio of total impact (Number of circ. per HIV inf. averted in MF over 5, 10, 20 & 30 years) for each target age group  
relative to targeting 15-24 year olds

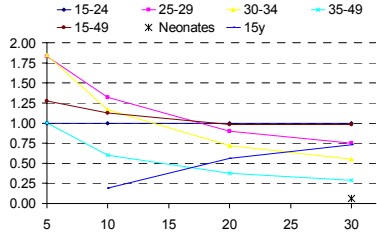

### 4) How do the effects vary with time scale?

Number of circumcisions per HIV-infection averted in adults aged 15-49 years olds over time

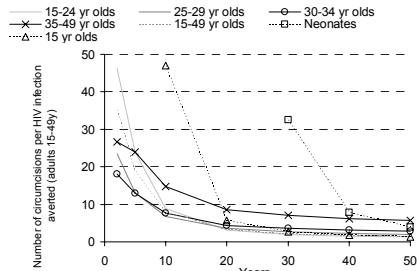

### 5) Do sexual mixing patterns affect the impact results?

Impact on HIV incidence in 15-24 year old females by circumcising males aged 25-29 years old

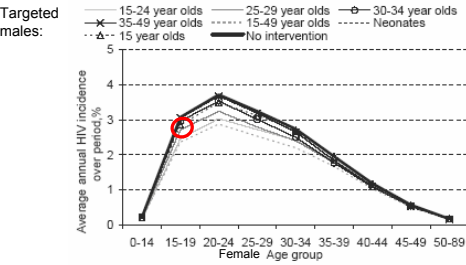

### 6) How are the impacts affected if other prevention interventions are scaled up at the same time?

Impact in scenario in which HIV incidence in 2020 is reduced from 2.6 to 1.1/100pyrs by increasing condom use in 2000  
Targeting 15-49 year old males

|                                                |                   | 10 years | 20 years |
|------------------------------------------------|-------------------|----------|----------|
| HIV incidence reduction, % (15-49y)            | - Default         | 16       | 27       |
|                                                | - Lower incidence | 15       | 23       |
| Number of circ. per infection averted (15-49y) | - Default         | 8        | 3        |
|                                                | - Lower incidence | 14       | 6        |

### 7) What is the effect of risk compensation?

Reduction in impact given full risk compensation?  
Impact of varying proportion of sexual contacts in casual and sex-worker contacts that are protected by condoms (with 10% failure rate) between 0% and 80% compared to 40% in the default scenario.

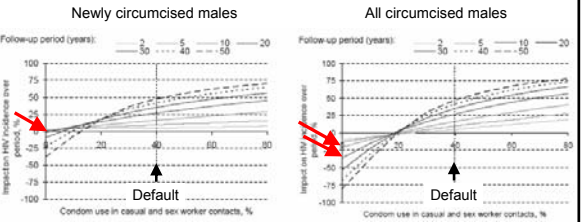

## 8) What are the discounted savings?

Cost required to avert one HIV infection in adults aged 15-49 years, over time compared with present value lifetime treatment costs (2007US\$)

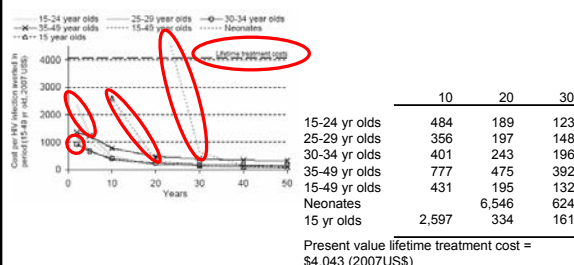Population level impact in males  
of circumcising HIV infected males (15-49y)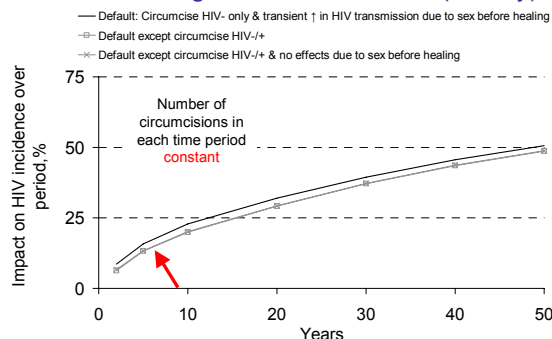Population level impact in females  
of circumcising HIV infected males (15-49y)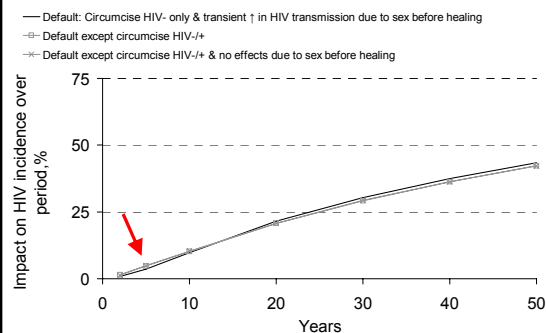Population level impact in females  
of assuming circumcision halves the per-contact  
male-to-female HIV transmission probability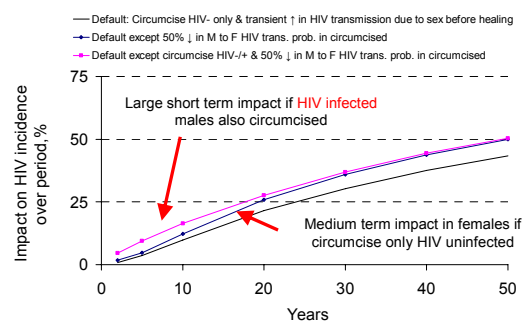

## Limitations

- May have **overestimated** impact
  - Have assumed impact of MC on ulcers
  - Falls in HIV incidence due to other interventions
- May have **underestimated** impact
  - No direct effect on M>F transmission
  - Over longer term because of increasing risk in effective intervention scenarios

Summary  
and policy implications

- Short term impact in **women** will be **small** **unless** strong direct impact on M>F transmission **and** circumcision of HIV+s
- Difference M vs F will reduce over time
- Over first 10 years, targeting 25-34 year olds may be more effective per-circumcision than targeting younger males
  - => Change recommended priority age group to 15-34?
- Will wait **20-40 years** to get population level impact via **neonates**

### Summary and policy implications

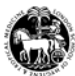

- To maximise the number of infections averted, scale-up quickly with high coverage, while maintaining quality(!)
- **Risk compensation**
  - If limited to newly circumcised, it will reduce impact over medium term & potential to negate impact over long term
  - Effect is strongly dependent on whether already-circumcised change behaviour  
=> target IEC at already-circumcised?

### Summary and policy implications

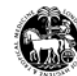

- Circumcising HIV+ males
  - Will reduce population level impact in **males** in short term *if* coverage of HIV-uninfected males not maintained
  - Population level impact in **females**
    - **may be small** *if* only small proportion of men resume sex before wound healing and circumcision lowers STI rates
    - **or may increase markedly** *if* there is a direct impact on M>F HIV transmission

### Acknowledgements

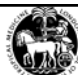

#### *London School of Hygiene and Tropical Medicine*

Judith Glynn, Helen Weiss, Kate Orroth, Esther Freeman, Richard Hayes

#### *Institute of Tropical Medicine, Antwerp*

Anne Buvé

#### *Erasmus Medical Center, Rotterdam*

Roel Bakker

#### *UCSF, US*

Craig Cohen

#### *Johns Hopkins, US*

Ron Gray

#### *Members of the Study Group on Heterogeneity of HIV Epidemics in African Cities*

#### *Funding*

Wellcome Trust / Medical Research Council
